# Supplementary material for: Four-dimensional characterization of a PFOA-contaminated fractured rock aquifer (FRA) in Bennington, Vermont, U.S.A
Source: Frontiers journal article supplement (doi:10.3389/frwa.2023.1117780), 2023-05-15
Supplement: Table_1.XLSX [file Table_1.XLSX]

## Sheet: Derivative__Map_Data
Point #	X (UTM)	Y (UTM)	Data Type_	Tag #	Well Report #	Date_Drilled	Well Depth (ft)	Ground Surface Elevation (ft)	Ground Surface Elevation (m)	Depth to Bedrock (ft)(BGS)	Depth to Bedrock (m)(BGS)	Bedrock Surface Elevation (ft)(ASL)	Bedrock Surface Elevation (m)(ASL)	Static Water Level (ft)(BGS)	Static Water Level (m)(BGS)	Static Water Level (ft)(ASL)	Static Water Level (m)(ASL)	Data Used for Map Figure(s)
1	643421	4752904	bedrock well					610.269	186.01	60	18.288	550.269	167.722	63.53	19.3639	546.739	166.646	Figure 6 (Bedrock Surface Contour) , Figure 7A (Isopach), and Figure 7B (Static Water Level) maps
2	641053	4751664	bedrock well		137	5/21/1979	185	698.502	212.903	17	5.1816	681.502	207.722	16.75	5.1054	681.752	207.798	Figure 6 (Bedrock Surface Contour) , Figure 7A (Isopach), and Figure 7B (Static Water Level) maps
3	642378	4752961	bedrock well	165	368	11/7/1990	165	603.317	183.891	18	5.4864	585.317	178.405	38.7	11.7958	564.617	172.095	Figure 6 (Bedrock Surface Contour) , Figure 7A (Isopach), and Figure 7B (Static Water Level) maps
4	641811	4751692	bedrock well	11175	11175	2/2/2000	345	680.266	207.345	13	3.9624	667.266	203.383	70.95	21.6256	609.316	185.72	Figure 6 (Bedrock Surface Contour) , Figure 7A (Isopach), and Figure 7B (Static Water Level) maps
5	641247	4754062	bedrock well	20	354	6/10/1990	185	595.143	181.4	40	12.192	555.143	169.208	38.63	11.7744	556.513	169.625	Figure 6 (Bedrock Surface Contour) , Figure 7A (Isopach), and Figure 7B (Static Water Level) maps
6	646935	4752976	bedrock well	23240	381	7/16/1991	252	946.752	288.57	60	18.288	886.752	270.282	134	40.8432	812.752	247.727	Figure 6 (Bedrock Surface Contour) , Figure 7A (Isopach), and Figure 7B (Static Water Level) maps
7	643240	4753099	bedrock well	40457	40457	1998	280	615.958	187.744	68	20.7264	547.958	167.018	70.44	21.4701	545.518	166.274	Figure 6 (Bedrock Surface Contour) , Figure 7A (Isopach), and Figure 7B (Static Water Level) maps
8	643288	4753114	bedrock well	35513	35513	2/24/2006	260	634.446	193.379	32	9.7536	602.446	183.625	60.65	18.4861	573.796	174.893	Figure 6 (Bedrock Surface Contour) , Figure 7A (Isopach), and Figure 7B (Static Water Level) maps
9	643389	4752952	bedrock well	7-434	413	8/2/1992	260	626.89	191.076	20	6.096	606.89	184.98	85.2	25.969	541.69	165.107	Figure 6 (Bedrock Surface Contour) , Figure 7A (Isopach), and Figure 7B (Static Water Level) maps
10	644209	4752676	bedrock well	46017	46017	6/14/2007	500	560.689	170.898	10	3.048	550.689	167.85					Figure 6 (Bedrock Surface Contour) , Figure 7A (Isopach), and Figure 7B (Static Water Level) maps
11	647019	4752642	bedrock well	570	2093	11/27/1996	540	880.791	268.465	26	7.9248	854.791	260.54	75	22.86	805.791	245.605	Figure 6 (Bedrock Surface Contour) , Figure 7A (Isopach), and Figure 7B (Static Water Level) maps
12	643251	4751418	bedrock well		265	3/23/1987	330	747.113	227.72	15	4.572	732.113	223.148	20	6.096	727.113	221.624	Figure 6 (Bedrock Surface Contour) , Figure 7A (Isopach), and Figure 7B (Static Water Level) maps
13	644942	4751573	bedrock well	32140	32140	8/28/2006	300	581.171	177.141	17	5.1816	564.171	171.959					Figure 6 (Bedrock Surface Contour) , Figure 7A (Isopach), and Figure 7B (Static Water Level) maps
14	644941	4752831	bedrock well	37160	2554	11/15/1996	185	594.327	181.151	105	32.004	489.327	149.147					Figure 6 (Bedrock Surface Contour) , Figure 7A (Isopach), and Figure 7B (Static Water Level) maps
15	643483	4752949	bedrock well	21252	21252	9/27/2002	570	645.413	196.722	12	3.6576	633.413	193.064	62	18.8976	583.413	177.824	Figure 6 (Bedrock Surface Contour) , Figure 7A (Isopach), and Figure 7B (Static Water Level) maps
16	643430	4752942	bedrock well	24774	24774	11/12/2003	300	626.801	191.049	28	8.5344	598.801	182.515	68	20.7264	558.801	170.323	Figure 6 (Bedrock Surface Contour) , Figure 7A (Isopach), and Figure 7B (Static Water Level) maps
17	646707	4752616	bedrock well	553	489	11/7/1995	220	831.506	253.443	38	11.5824	793.506	241.861	40	12.192	791.506	241.251	Figure 6 (Bedrock Surface Contour) , Figure 7A (Isopach), and Figure 7B (Static Water Level) maps
18	642490	4752638	bedrock well	14118	14118	6/26/2000	345	541.214	164.962	16	4.8768	525.214	160.085	12	3.6576	529.214	161.304	Figure 6 (Bedrock Surface Contour) , Figure 7A (Isopach), and Figure 7B (Static Water Level) maps
19	645291	4753035	bedrock well	17869	17869	4/8/2002	215	648.471	197.654	38	11.5824	610.471	186.072					Figure 6 (Bedrock Surface Contour) , Figure 7A (Isopach), and Figure 7B (Static Water Level) maps
20	644027	4752569	bedrock well	37354	492	5/22/1996	202	559.938	170.669	75	22.86	484.938	147.809	25	7.62	534.938	163.049	Figure 6 (Bedrock Surface Contour) , Figure 7A (Isopach), and Figure 7B (Static Water Level) maps
21	643995	4752473	bedrock well	7-579	423	10/18/1993	180	570.843	173.993	165	50.292	405.843	123.701	10	3.048	560.843	170.945	Figure 6 (Bedrock Surface Contour) , Figure 7A (Isopach), and Figure 7B (Static Water Level) maps
22	646456	4752604	bedrock well	10468	0	6/10/1976	155	791.306	241.19	10	3.048	781.306	238.142					Figure 6 (Bedrock Surface Contour) , Figure 7A (Isopach), and Figure 7B (Static Water Level) maps
23	643528	4751572	bedrock well	41468	41468	11/12/2009	400	795.568	242.489	13	3.9624	782.568	238.527	20	6.096	775.568	236.393	Figure 6 (Bedrock Surface Contour) , Figure 7A (Isopach), and Figure 7B (Static Water Level) maps
24	642286	4753197	bedrock well	166	369	11/7/1990	205	660.115	201.203	7	2.1336	653.115	199.069	20	6.096	640.115	195.107	Figure 6 (Bedrock Surface Contour) , Figure 7A (Isopach), and Figure 7B (Static Water Level) maps
25	641704	4753632	bedrock well	146	355	7/12/1990	365	632.844	192.891	5	1.524	627.844	191.367	10	3.048	622.844	189.843	Figure 6 (Bedrock Surface Contour) , Figure 7A (Isopach), and Figure 7B (Static Water Level) maps
26	644374	4749736	bedrock well	48629	48629	12/14/2012	360	842.29	256.73	3	0.9144	839.29	255.816	36	10.9728	806.29	245.757	Figure 6 (Bedrock Surface Contour) , Figure 7A (Isopach), and Figure 7B (Static Water Level) maps
27	641628	4753722	bedrock well	32871	32871	8/27/2007	80	634.721	193.463	3	0.9144	631.721	192.549	25	7.62	609.721	185.843	Figure 6 (Bedrock Surface Contour) , Figure 7A (Isopach), and Figure 7B (Static Water Level) maps
28	644264	4750938	bedrock well	27662	27662	8/25/2004	400	884.908	269.72	17	5.1816	867.908	264.538	40	12.192	844.908	257.528	Figure 6 (Bedrock Surface Contour) , Figure 7A (Isopach), and Figure 7B (Static Water Level) maps
29	642087	4753185	bedrock well	389	382	7/9/1991	620	591.234	180.208	17	5.1816	574.234	175.026	38	11.5824	553.234	168.626	Figure 6 (Bedrock Surface Contour) , Figure 7A (Isopach), and Figure 7B (Static Water Level) maps
30	643939	4752778	bedrock well	446	401	8/24/1992	60	554.413	168.985	31	9.4488	523.413	159.536	5	1.524	549.413	167.461	Figure 6 (Bedrock Surface Contour) , Figure 7A (Isopach), and Figure 7B (Static Water Level) maps
31	643461	4752953	bedrock well	15459	15459	4/12/2001	400	643.301	196.078	4	1.2192	639.301	194.859	40	12.192	603.301	183.886	Figure 6 (Bedrock Surface Contour) , Figure 7A (Isopach), and Figure 7B (Static Water Level) maps
32	643310	4753006	bedrock well	41429	41429	6/22/2009	220	621.549	189.448	17	5.1816	604.549	184.266	25	7.62	596.549	181.828	Figure 6 (Bedrock Surface Contour) , Figure 7A (Isopach), and Figure 7B (Static Water Level) maps
33	643448	4753045	bedrock well	40411	40411	3/12/2008	520	682.979	208.172	65	19.812	617.979	188.36	57	17.3736	625.979	190.798	Figure 6 (Bedrock Surface Contour) , Figure 7A (Isopach), and Figure 7B (Static Water Level) maps
34	641679	4754637	bedrock well	34589	34589	11/28/2005	520	553.475	168.699	7	2.1336	546.475	166.566	22	6.7056	531.475	161.994	Figure 6 (Bedrock Surface Contour) , Figure 7A (Isopach), and Figure 7B (Static Water Level) maps
35	641392	4753856	bedrock well	40407	40407	2/28/2008	500	621.854	189.541	61	18.5928	560.854	170.948	50	15.24	571.854	174.301	Figure 6 (Bedrock Surface Contour) , Figure 7A (Isopach), and Figure 7B (Static Water Level) maps
36	644789	4751592	bedrock well	46288	46288	10/22/2007	220	590.666	180.035	15	4.572	575.666	175.463	12	3.6576	578.666	176.377	Figure 6 (Bedrock Surface Contour) , Figure 7A (Isopach), and Figure 7B (Static Water Level) maps
37	643307	4751925	bedrock well	41463	41463	10/23/2009	140	679.147	207.004	85	25.908	594.147	181.096	20	6.096	659.147	200.908	Figure 6 (Bedrock Surface Contour) , Figure 7A (Isopach), and Figure 7B (Static Water Level) maps
38	643735	4750949	bedrock well	513	445	11/17/1994	640	817.238	249.094	35	10.668	782.238	238.426	21	6.4008	796.238	242.693	Figure 6 (Bedrock Surface Contour) , Figure 7A (Isopach), and Figure 7B (Static Water Level) maps
39	644759	4753034	bedrock well	791	5730	2/26/1998	305	616.575	187.932	12	3.6576	604.575	184.274	32	9.7536	584.575	178.178	Figure 6 (Bedrock Surface Contour) , Figure 7A (Isopach), and Figure 7B (Static Water Level) maps
40	644895	4752851	bedrock well	7-915	3934	8/8/1997	120	600.669	183.084	40	12.192	560.669	170.892	20	6.096	580.669	176.988	Figure 6 (Bedrock Surface Contour) , Figure 7A (Isopach), and Figure 7B (Static Water Level) maps
41	645130	4752972	bedrock well	46195	46195	11/12/2008	180	615.787	187.692	80	24.384	535.787	163.308					Figure 6 (Bedrock Surface Contour) , Figure 7A (Isopach), and Figure 7B (Static Water Level) maps
42	644991	4752938	bedrock well	46226	46226	4/25/2007	190	601.165	183.235	35	10.668	566.165	172.567	1	0.3048	600.165	182.93	Figure 6 (Bedrock Surface Contour) , Figure 7A (Isopach), and Figure 7B (Static Water Level) maps
43	644287	4752873	bedrock well	56038	56038	10/16/2014	145	556.985	169.769	21	6.4008	535.985	163.368	10	3.048	546.985	166.721	Figure 6 (Bedrock Surface Contour) , Figure 7A (Isopach), and Figure 7B (Static Water Level) maps
44	643248	4750921	bedrock well	43612	43612	2/4/2010	600	769.954	234.682	38	11.5824	731.954	223.1	12	3.6576	757.954	231.024	Figure 6 (Bedrock Surface Contour) , Figure 7A (Isopach), and Figure 7B (Static Water Level) maps
45	643353	4751355	bedrock well	40441	40441	9/3/2008	580	763.192	232.621	24	7.3152	739.192	225.306	32	9.7536	731.192	222.867	Figure 6 (Bedrock Surface Contour) , Figure 7A (Isopach), and Figure 7B (Static Water Level) maps
46	642850	4749821	bedrock well	30277	30277	8/29/2005	220	788.973	240.479	65	19.812	723.973	220.667					Figure 6 (Bedrock Surface Contour) , Figure 7A (Isopach), and Figure 7B (Static Water Level) maps
47	648617	4754093	bedrock well	17870	17870	4/9/2002	176	1032.68	314.761	72	21.9456	960.68	292.815	22	6.7056	1010.68	308.055	Figure 6 (Bedrock Surface Contour) , Figure 7A (Isopach), and Figure 7B (Static Water Level) maps
48	648605	4754745	bedrock well	33816	33816	11/26/2007	560	1035.59	315.648	75	22.86	960.591	292.788	69	21.0312	966.591	294.617	Figure 6 (Bedrock Surface Contour) , Figure 7A (Isopach), and Figure 7B (Static Water Level) maps
49	648231	4754385	bedrock well	26009	26009	1/9/2004	480	960.217	292.674	43	13.1064	917.217	279.568	175	53.34	785.217	239.334	Figure 6 (Bedrock Surface Contour) , Figure 7A (Isopach), and Figure 7B (Static Water Level) maps
50	648163	4754583	bedrock well	14194	14194	1/18/2001	480	1005.58	306.501	94	28.6512	911.581	277.85	190	57.912	815.581	248.589	Figure 6 (Bedrock Surface Contour) , Figure 7A (Isopach), and Figure 7B (Static Water Level) maps
51	647848	4754520	bedrock well	18524	18524	9/6/2001	340	1060.47	323.232	60	18.288	1000.47	304.944	30	9.144	1030.47	314.088	Figure 6 (Bedrock Surface Contour) , Figure 7A (Isopach), and Figure 7B (Static Water Level) maps
52	647865	4754557	bedrock well	21302	21302	5/1/2002	400	1061.76	323.623	55	16.764	1006.76	306.859	240	73.152	821.755	250.471	Figure 6 (Bedrock Surface Contour) , Figure 7A (Isopach), and Figure 7B (Static Water Level) maps
53	647525	4754395	bedrock well	27611	27611	3/22/2004	400	1055.28	321.648	35	10.668	1020.28	310.98	220	67.056	835.276	254.592	Figure 6 (Bedrock Surface Contour) , Figure 7A (Isopach), and Figure 7B (Static Water Level) maps
54	646962	4754005	bedrock well	30221	30221	4/11/2005	220	967.608	294.927	35	10.668	932.608	284.259	185	56.388	782.608	238.539	Figure 6 (Bedrock Surface Contour) , Figure 7A (Isopach), and Figure 7B (Static Water Level) maps
55	647722	4754265	bedrock well	27677	27677	9/22/2004	400	1076.41	328.09	62	18.8976	1014.41	309.192	250	76.2	826.411	251.89	Figure 6 (Bedrock Surface Contour) , Figure 7A (Isopach), and Figure 7B (Static Water Level) maps
56	647749	4754323	bedrock well	25782	25782	11/5/2003	420	1074.85	327.615	45	13.716	1029.85	313.899	260	79.248	814.852	248.367	Figure 6 (Bedrock Surface Contour) , Figure 7A (Isopach), and Figure 7B (Static Water Level) maps
57	647525	4754393	bedrock well	34864	34864	2/22/2006	400	1054.55	321.428	30	9.144	1024.55	312.284	265	80.772	789.554	240.656	Figure 6 (Bedrock Surface Contour) , Figure 7A (Isopach), and Figure 7B (Static Water Level) maps
58	647200	4754295	bedrock well	48930	48930	6/18/2013	260	1007.06	306.951	20	6.096	987.057	300.855	235	71.628	772.057	235.323	Figure 6 (Bedrock Surface Contour) , Figure 7A (Isopach), and Figure 7B (Static Water Level) maps
59	647036	4754223	bedrock well	35786	35786	5/24/2006	245	983.419	299.746	8	2.4384	975.419	297.308	15	4.572	968.419	295.174	Figure 6 (Bedrock Surface Contour) , Figure 7A (Isopach), and Figure 7B (Static Water Level) maps
60	647677	4754311	bedrock well	46057	46057	4/11/2008	400	1085.14	330.752	46	14.0208	1039.14	316.731	270	82.296	815.144	248.456	Figure 6 (Bedrock Surface Contour) , Figure 7A (Isopach), and Figure 7B (Static Water Level) maps
61	647337	4754404	bedrock well	43382	43382	6/15/2010	325	1034.11	315.198	40	12.192	994.114	303.006	26	7.9248	1008.11	307.273	Figure 6 (Bedrock Surface Contour) , Figure 7A (Isopach), and Figure 7B (Static Water Level) maps
62	647218	4754348	bedrock well	42076	42076	8/18/2011	290	1013.81	309.01	13	3.9624	1000.81	305.048	250	76.2	763.812	232.81	Figure 6 (Bedrock Surface Contour) , Figure 7A (Isopach), and Figure 7B (Static Water Level) maps
63	648538	4754485	bedrock well	48627	48627	12/7/2012	135	1027.31	313.124	0	0	1027.31	313.124	21	6.4008	1006.31	306.723	Figure 6 (Bedrock Surface Contour) , Figure 7A (Isopach), and Figure 7B (Static Water Level) maps
64	647705	4753966	bedrock well	25719	25719	4/16/2003	320	1012.07	308.479	90	27.432	922.07	281.047	170	51.816	842.07	256.663	Figure 6 (Bedrock Surface Contour) , Figure 7A (Isopach), and Figure 7B (Static Water Level) maps
65	644902	4750387	bedrock well	34568	34568	9/15/2005	300	738.31	225.037	12	3.6576	726.31	221.379	41	12.4968	697.31	212.54	Figure 6 (Bedrock Surface Contour) , Figure 7A (Isopach), and Figure 7B (Static Water Level) maps
66	644879	4752508	bedrock well	17863	17863	3/26/2002	620	566.033	172.527	42	12.8016	524.033	159.725	6	1.8288	560.033	170.698	Figure 6 (Bedrock Surface Contour) , Figure 7A (Isopach), and Figure 7B (Static Water Level) maps
67	644788	4752558	bedrock well	17865	17865	3/29/2002	420	568.251	173.203	41	12.4968	527.251	160.706	7	2.1336	561.251	171.069	Figure 6 (Bedrock Surface Contour) , Figure 7A (Isopach), and Figure 7B (Static Water Level) maps
68	644459	4752585	bedrock well	56039	56039	10/22/2004	500	570.213	173.801	3	0.9144	567.213	172.887	250	76.2	320.213	97.601	Figure 6 (Bedrock Surface Contour) , Figure 7A (Isopach), and Figure 7B (Static Water Level) maps
69	644722	4752921	bedrock well	29162	29162	9/15/2004	240	626.198	190.865	14	4.2672	612.198	186.598	38	11.5824	588.198	179.283	Figure 6 (Bedrock Surface Contour) , Figure 7A (Isopach), and Figure 7B (Static Water Level) maps
70	643960	4752264	bedrock well	21215	21215	7/19/2002	560	584.541	178.168	22	6.7056	562.541	171.462	8	2.4384	576.541	175.73	Figure 6 (Bedrock Surface Contour) , Figure 7A (Isopach), and Figure 7B (Static Water Level) maps
71	643736	4752184	bedrock well	17822	17822	10/27/2001	560	649.121	197.852	52	15.8496	597.121	182.002	32	9.7536	617.121	188.098	Figure 6 (Bedrock Surface Contour) , Figure 7A (Isopach), and Figure 7B (Static Water Level) maps
72	642286	4751023	bedrock well	48675	48675	5/26/2014	660	769.163	234.441	4	1.2192	765.163	233.222	53	16.1544	716.163	218.287	Figure 6 (Bedrock Surface Contour) , Figure 7A (Isopach), and Figure 7B (Static Water Level) maps
73	642852	4750941	bedrock well	18563	18563	12/3/2001	380	771.539	235.165	155	47.244	616.539	187.921	30	9.144	741.539	226.021	Figure 6 (Bedrock Surface Contour) , Figure 7A (Isopach), and Figure 7B (Static Water Level) maps
74	642808	4750166	bedrock well	48601	48601	4/24/2012	260	799.554	243.704	54	16.4592	745.554	227.245					Figure 6 (Bedrock Surface Contour) , Figure 7A (Isopach), and Figure 7B (Static Water Level) maps
75	642098	4749729	bedrock well	42079	42079	8/23/2011	145	859.672	262.028	130	39.624	729.672	222.404	35	10.668	824.672	251.36	Figure 6 (Bedrock Surface Contour) , Figure 7A (Isopach), and Figure 7B (Static Water Level) maps
76	641260	4748639	bedrock well	27621	27621	10/7/2004	400	921.944	281.009	25	7.62	896.944	273.389	40	12.192	881.944	268.817	Figure 6 (Bedrock Surface Contour) , Figure 7A (Isopach), and Figure 7B (Static Water Level) maps
77	642814	4749063	bedrock well	18576	18576	1/9/2002	160	853.422	260.123	10	3.048	843.422	257.075	35	10.668	818.422	249.455	Figure 6 (Bedrock Surface Contour) , Figure 7A (Isopach), and Figure 7B (Static Water Level) maps
78	644591	4749508	bedrock well	15393	15393	8/11/2000	340	820.007	249.938	18	5.4864	802.007	244.452	5	1.524	815.007	248.414	Figure 6 (Bedrock Surface Contour) , Figure 7A (Isopach), and Figure 7B (Static Water Level) maps
79	644566	4749568	bedrock well	18599	18599	4/22/2002	140	821.135	250.282	25	7.62	796.135	242.662					Figure 6 (Bedrock Surface Contour) , Figure 7A (Isopach), and Figure 7B (Static Water Level) maps
80	641533	4752965	bedrock well	40426	40426	7/3/2008	360	581.987	177.39	8	2.4384	573.987	174.951	37	11.2776	544.987	166.112	Figure 6 (Bedrock Surface Contour) , Figure 7A (Isopach), and Figure 7B (Static Water Level) maps
81	646492	4750876	bedrock well	4813	529	9/29/1966	90	608.711	185.535	60	18.288	548.711	167.247	7	2.1336	601.711	183.401	Figure 6 (Bedrock Surface Contour) , Figure 7A (Isopach), and Figure 7B (Static Water Level) maps
82	644664	4754529	bedrock well	17862	17862	3/22/2002	240	699.678	213.262	7	2.1336	692.678	211.128	28	8.5344	671.678	204.728	Figure 6 (Bedrock Surface Contour) , Figure 7A (Isopach), and Figure 7B (Static Water Level) maps
83	644718	4754357	bedrock well	16885	16885	7/16/2001	660	716.795	218.479	13	3.9624	703.795	214.517	37	11.2776	679.795	207.201	Figure 6 (Bedrock Surface Contour) , Figure 7A (Isopach), and Figure 7B (Static Water Level) maps
84	644803	4754376	bedrock well	35584	35584	10/20/2006	380	698.99	213.052	1	0.3048	697.99	212.747	38	11.5824	660.99	201.47	Figure 6 (Bedrock Surface Contour) , Figure 7A (Isopach), and Figure 7B (Static Water Level) maps
85	645237	4754660	bedrock well	27729	27729	6/2/2004	400	745.351	227.183	10	3.048	735.351	224.135					Figure 6 (Bedrock Surface Contour) , Figure 7A (Isopach), and Figure 7B (Static Water Level) maps
86	645766	4754350	bedrock well	24766	24766	10/23/2003	140	725.023	220.987	68	20.7264	657.023	200.261					Figure 6 (Bedrock Surface Contour) , Figure 7A (Isopach), and Figure 7B (Static Water Level) maps
87	645778	4754497	bedrock well	41978	41978	8/9/2012	360	739.695	225.459	70	21.336	669.695	204.123	20	6.096	719.695	219.363	Figure 6 (Bedrock Surface Contour) , Figure 7A (Isopach), and Figure 7B (Static Water Level) maps
88	645760	4754541	bedrock well	34894	34894	5/22/2006	200	741.594	226.038	90	27.432	651.594	198.606	15	4.572	726.594	221.466	Figure 6 (Bedrock Surface Contour) , Figure 7A (Isopach), and Figure 7B (Static Water Level) maps
89	646073	4754198	bedrock well	32129	32129	7/28/2006	220	784.262	239.043	30	9.144	754.262	229.899	40	12.192	744.262	226.851	Figure 6 (Bedrock Surface Contour) , Figure 7A (Isopach), and Figure 7B (Static Water Level) maps
90	646097	4754415	bedrock well	14195	14195	1/22/2001	320	761.88	232.221	34	10.3632	727.88	221.858					Figure 6 (Bedrock Surface Contour) , Figure 7A (Isopach), and Figure 7B (Static Water Level) maps
91	648029	4754013	bedrock well	46001	46001	3/27/2007	108	993.56	302.837	108	32.9184	885.56	269.919	50	15.24	943.56	287.597	Figure 6 (Bedrock Surface Contour) , Figure 7A (Isopach), and Figure 7B (Static Water Level) maps
92	648855	4752276	bedrock well	17855	17855	1/31/2002	308	969.222	295.419	70	21.336	899.222	274.083	48	14.6304	921.222	280.789	Figure 6 (Bedrock Surface Contour) , Figure 7A (Isopach), and Figure 7B (Static Water Level) maps
93	648300	4754411	bedrock well	26009	26009	1/9/2004	480	958.205	292.061	43	13.1064	915.205	278.955	175	53.34	783.205	238.721	Figure 6 (Bedrock Surface Contour) , Figure 7A (Isopach), and Figure 7B (Static Water Level) maps
94	647433	4752969	bedrock well	15386	15386	7/20/2000	200	870.223	265.244	70	21.336	800.223	243.908	30	9.144	840.223	256.1	Figure 6 (Bedrock Surface Contour) , Figure 7A (Isopach), and Figure 7B (Static Water Level) maps
95	647086	4753159	bedrock well	34551	34551	6/23/2005	280	965.41	294.257	14	4.2672	951.41	289.99	123	37.4904	842.41	256.767	Figure 6 (Bedrock Surface Contour) , Figure 7A (Isopach), and Figure 7B (Static Water Level) maps
96	647110	4751688	bedrock well	30361	30361	6/20/2005	500	766.483	233.624	5	1.524	761.483	232.1	40	12.192	726.483	221.432	Figure 6 (Bedrock Surface Contour) , Figure 7A (Isopach), and Figure 7B (Static Water Level) maps
97	647181	4751904	bedrock well	11199	11199	6/6/2000	240	703.924	214.556	70	21.336	633.924	193.22	15	4.572	688.924	209.984	Figure 6 (Bedrock Surface Contour) , Figure 7A (Isopach), and Figure 7B (Static Water Level) maps
98	646392	4752981	bedrock well		266	5/6/1987	350	862.93	263.021	5	1.524	857.93	261.497	40	12.192	822.93	250.829	Figure 6 (Bedrock Surface Contour) , Figure 7A (Isopach), and Figure 7B (Static Water Level) maps
99	646016	4753123	bedrock well	33475	33475	9/3/2006	170	796.122	242.658	12	3.6576	784.122	239					Figure 6 (Bedrock Surface Contour) , Figure 7A (Isopach), and Figure 7B (Static Water Level) maps
100	645904	4753174	bedrock well	35563	35563	8/30/2006	240	790.351	240.899	12	3.6576	778.351	237.241	174	53.0352	616.351	187.864	Figure 6 (Bedrock Surface Contour) , Figure 7A (Isopach), and Figure 7B (Static Water Level) maps
101	645800	4750130	bedrock well	43603	43603	12/17/2009	560	842.11	256.675	12	3.6576	830.11	253.017	112	34.1376	730.11	222.537	Figure 6 (Bedrock Surface Contour) , Figure 7A (Isopach), and Figure 7B (Static Water Level) maps
102	642732	4748959	bedrock well	46207	46207	1/23/2007	220	853.173	260.047	32	9.7536	821.173	250.293	10	3.048	843.173	256.999	Figure 6 (Bedrock Surface Contour) , Figure 7A (Isopach), and Figure 7B (Static Water Level) maps
103	642327	4749032	bedrock well	41360	41360	10/22/2007	225	872.247	265.861	140	42.672	732.247	223.189					Figure 6 (Bedrock Surface Contour) , Figure 7A (Isopach), and Figure 7B (Static Water Level) maps
104	641960	4748667	bedrock well	33445	33445	6/26/2006	100	838.234	255.494	58	17.6784	780.234	237.815					Figure 6 (Bedrock Surface Contour) , Figure 7A (Isopach), and Figure 7B (Static Water Level) maps
105	641432	4748306	bedrock well	41438	41438	8/10/2009	220	797.638	243.12	52	15.8496	745.638	227.27					Figure 6 (Bedrock Surface Contour) , Figure 7A (Isopach), and Figure 7B (Static Water Level) maps
106	640832	4748387	bedrock well	30359	30359	6/15/2005	420	823.158	250.898	70	21.336	753.158	229.563	40	12.192	783.158	238.706	Figure 6 (Bedrock Surface Contour) , Figure 7A (Isopach), and Figure 7B (Static Water Level) maps
107	641697	4754729	bedrock well	17821	17821	10/23/2001	340	557.96	170.066	4	1.2192	553.96	168.847	42	12.8016	515.96	157.265	Figure 6 (Bedrock Surface Contour) , Figure 7A (Isopach), and Figure 7B (Static Water Level) maps
108	641653	4755024	bedrock well	40442	40442	9/5/2008	360	533.581	162.636	10	3.048	523.581	159.588	37	11.2776	496.581	151.358	Figure 6 (Bedrock Surface Contour) , Figure 7A (Isopach), and Figure 7B (Static Water Level) maps
109	645386	4754595	bedrock well	16886	16886	7/16/2001	320	750.085	228.626	15	4.572	735.085	224.054	57	17.3736	693.085	211.252	Figure 6 (Bedrock Surface Contour) , Figure 7A (Isopach), and Figure 7B (Static Water Level) maps
110	643698	4748812	bedrock well	52031	52031	12/11/2015	600	957.89	291.965	8	2.4384	949.891	289.527	48	14.6304	909.89	277.335	Figure 6 (Bedrock Surface Contour) , Figure 7A (Isopach), and Figure 7B (Static Water Level) maps
111	643946	4748769	bedrock well	48982	48982	5/8/2014	220	969.954	295.642	4	1.2192	965.954	294.423	20	6.096	949.954	289.546	Figure 6 (Bedrock Surface Contour) , Figure 7A (Isopach), and Figure 7B (Static Water Level) maps
112	645292	4748959	bedrock well	29161	29161	9/14/2004	360	876.519	267.163	12	3.6576	864.519	263.505	20	6.096	856.519	261.067	Figure 6 (Bedrock Surface Contour) , Figure 7A (Isopach), and Figure 7B (Static Water Level) maps
113	645593	4753007	bedrock well		136	5/15/1979	150	688.881	209.971	55	16.764	633.881	193.207	15	4.572	673.881	205.399	Figure 6 (Bedrock Surface Contour) , Figure 7A (Isopach), and Figure 7B (Static Water Level) maps
114	645487	4753794	bedrock well		211	4/7/1981	120	731.299	222.9	4	1.2192	727.299	221.681	20	6.096	711.299	216.804	Figure 6 (Bedrock Surface Contour) , Figure 7A (Isopach), and Figure 7B (Static Water Level) maps
115	645756	4753782	bedrock well		237	6/8/1981	100	747.477	227.831	3	0.9144	744.477	226.917	12	3.6576	735.477	224.173	Figure 6 (Bedrock Surface Contour) , Figure 7A (Isopach), and Figure 7B (Static Water Level) maps
116	642633	4755188	bedrock well	56060	56060	1/12/2015	300	637.165	194.208	21	6.4008	616.165	187.807	25	7.62	612.165	186.588	Figure 6 (Bedrock Surface Contour) , Figure 7A (Isopach), and Figure 7B (Static Water Level) maps
117	641934	4755442	bedrock well	18530	18530	9/19/2001	220	555.757	169.395	50	15.24	505.757	154.155	20	6.096	535.757	163.299	Figure 6 (Bedrock Surface Contour) , Figure 7A (Isopach), and Figure 7B (Static Water Level) maps
118	641574	4755234	bedrock well	18570	18570	12/19/2001	320	527.152	160.676	19	5.7912	508.152	154.885	20	6.096	507.152	154.58	Figure 6 (Bedrock Surface Contour) , Figure 7A (Isopach), and Figure 7B (Static Water Level) maps
119	643647	4755305	bedrock well	16882	16882	6/28/2001	680	710.456	216.547	13	3.9624	697.456	212.585	23	7.0104	687.456	209.537	Figure 6 (Bedrock Surface Contour) , Figure 7A (Isopach), and Figure 7B (Static Water Level) maps
120	648043	4750775	bedrock well	15444	15444	1/19/2001	280	680.869	207.529	30	9.144	650.869	198.385	50	15.24	630.869	192.289	Figure 6 (Bedrock Surface Contour) , Figure 7A (Isopach), and Figure 7B (Static Water Level) maps
121	647380	4752773	bedrock well	24729	24729	7/15/2003	180	834.245	254.278	69	21.0312	765.245	233.247	65	19.812	769.245	234.466	Figure 6 (Bedrock Surface Contour) , Figure 7A (Isopach), and Figure 7B (Static Water Level) maps
122	643295	4753971	bedrock well	599	15066	6/16/1982	300	568.635	173.32	23	7.0104	545.635	166.31					Figure 6 (Bedrock Surface Contour) , Figure 7A (Isopach), and Figure 7B (Static Water Level) maps
123	644391	4752657	bedrock well		202	12/9/1981	345	579.76	176.711	8	2.4384	571.76	174.273					Figure 6 (Bedrock Surface Contour) , Figure 7A (Isopach), and Figure 7B (Static Water Level) maps
124	643309	4753088	bedrock well	43341	43341	11/18/2010	245	637.736	194.382	60	18.288	577.736	176.094	30	9.144	607.736	185.238	Figure 6 (Bedrock Surface Contour) , Figure 7A (Isopach), and Figure 7B (Static Water Level) maps
125	643168	4752781	monitoring well			5/14-16/2016	21	548.494	167.181	19	5.7912	529.494	161.39					Figure 6 (Bedrock Surface Contour) , Figure 7A (Isopach), and Figure 7B (Static Water Level) maps
126	643145	4752772	monitoring well			5/14-16/2016	21	548.146	167.075	19	5.7912	529.146	161.284					Figure 6 (Bedrock Surface Contour) , Figure 7A (Isopach), and Figure 7B (Static Water Level) maps
127	643118	4752725	monitoring well			5/14-16/2016	13	546.847	166.679	9	2.7432	537.847	163.936					Figure 6 (Bedrock Surface Contour) , Figure 7A (Isopach), and Figure 7B (Static Water Level) maps
128	643160	4752729	monitoring well			5/14-16/2016	21	547.867	166.99	19	5.7912	528.867	161.199					Figure 6 (Bedrock Surface Contour) , Figure 7A (Isopach), and Figure 7B (Static Water Level) maps
129	643125	4752602	monitoring well			5/14-16/2016	36	543.799	165.75	30	9.144	513.799	156.606					Figure 6 (Bedrock Surface Contour) , Figure 7A (Isopach), and Figure 7B (Static Water Level) maps
130	642262	4.75405e+06	DeSimone (2017) Bedrock Outcrop					751.26	228.984			751.26	228.984					Figure 6 (Bedrock Surface Contour) and Figure 7A (Isopach) maps
131	642251	4.75398e+06	DeSimone (2017) Bedrock Outcrop					754.006	229.821			754.006	229.821					Figure 6 (Bedrock Surface Contour) and Figure 7A (Isopach) maps
132	641793	4.75352e+06	DeSimone (2017) Bedrock Outcrop					644.696	196.503			644.696	196.503					Figure 6 (Bedrock Surface Contour) and Figure 7A (Isopach) maps
133	641573	4.75306e+06	DeSimone (2017) Bedrock Outcrop					541.693	165.108			541.693	165.108					Figure 6 (Bedrock Surface Contour) and Figure 7A (Isopach) maps
134	641501	4.75311e+06	DeSimone (2017) Bedrock Outcrop					538.366	164.094			538.366	164.094					Figure 6 (Bedrock Surface Contour) and Figure 7A (Isopach) maps
135	643033	4.75341e+06	DeSimone (2017) Bedrock Outcrop					589.455	179.666			589.455	179.666					Figure 6 (Bedrock Surface Contour) and Figure 7A (Isopach) maps
136	643033	4.75349e+06	DeSimone (2017) Bedrock Outcrop					596.26	181.74			596.26	181.74					Figure 6 (Bedrock Surface Contour) and Figure 7A (Isopach) maps
137	643115	4.7539e+06	DeSimone (2017) Bedrock Outcrop					630.764	192.257			630.764	192.257					Figure 6 (Bedrock Surface Contour) and Figure 7A (Isopach) maps
138	643319	4.75405e+06	DeSimone (2017) Bedrock Outcrop					580.564	176.956			580.564	176.956					Figure 6 (Bedrock Surface Contour) and Figure 7A (Isopach) maps
139	643420	4.75417e+06	DeSimone (2017) Bedrock Outcrop					625.423	190.629			625.423	190.629					Figure 6 (Bedrock Surface Contour) and Figure 7A (Isopach) maps
140	643465	4.75415e+06	DeSimone (2017) Bedrock Outcrop					648.524	197.67			648.524	197.67					Figure 6 (Bedrock Surface Contour) and Figure 7A (Isopach) maps
141	643383	4.75434e+06	DeSimone (2017) Bedrock Outcrop					585.515	178.465			585.515	178.465					Figure 6 (Bedrock Surface Contour) and Figure 7A (Isopach) maps
142	643187	4.75306e+06	DeSimone (2017) Bedrock Outcrop					553.15	168.6			553.15	168.6					Figure 6 (Bedrock Surface Contour) and Figure 7A (Isopach) maps
143	640713	4.75082e+06	DeSimone (2017) Bedrock Outcrop					780.831	237.997			780.831	237.997					Figure 6 (Bedrock Surface Contour) and Figure 7A (Isopach) maps
144	640737	4.75095e+06	DeSimone (2017) Bedrock Outcrop					796.282	242.707			796.282	242.707					Figure 6 (Bedrock Surface Contour) and Figure 7A (Isopach) maps
145	640795	4.75107e+06	DeSimone (2017) Bedrock Outcrop					752.206	229.272			752.206	229.272					Figure 6 (Bedrock Surface Contour) and Figure 7A (Isopach) maps
146	640858	4.7512e+06	DeSimone (2017) Bedrock Outcrop					729.435	222.332			729.435	222.332					Figure 6 (Bedrock Surface Contour) and Figure 7A (Isopach) maps
147	640835	4.7513e+06	DeSimone (2017) Bedrock Outcrop					741.831	226.11			741.831	226.11					Figure 6 (Bedrock Surface Contour) and Figure 7A (Isopach) maps
148	640885	4.75135e+06	DeSimone (2017) Bedrock Outcrop					737.779	224.875			737.779	224.875					Figure 6 (Bedrock Surface Contour) and Figure 7A (Isopach) maps
149	641388	4.75091e+06	DeSimone (2017) Bedrock Outcrop					829.208	252.743			829.208	252.743					Figure 6 (Bedrock Surface Contour) and Figure 7A (Isopach) maps
150	641893	4.75225e+06	DeSimone (2017) Bedrock Outcrop					598.142	182.314			598.142	182.314					Figure 6 (Bedrock Surface Contour) and Figure 7A (Isopach) maps
151	641851	4.75234e+06	DeSimone (2017) Bedrock Outcrop					573.943	174.938			573.943	174.938					Figure 6 (Bedrock Surface Contour) and Figure 7A (Isopach) maps
152	643194	4.74746e+06	DeSimone (2017) Bedrock Outcrop					1211.54	369.276			1211.54	369.276					Figure 6 (Bedrock Surface Contour) and Figure 7A (Isopach) maps
153	646213	4.74769e+06	DeSimone (2017) Bedrock Outcrop					857.126	261.252			857.126	261.252					Figure 6 (Bedrock Surface Contour) and Figure 7A (Isopach) maps
154	646009	4.74809e+06	DeSimone (2017) Bedrock Outcrop					840.65	256.23			840.65	256.23					Figure 6 (Bedrock Surface Contour) and Figure 7A (Isopach) maps
155	645573	4.7476e+06	DeSimone (2017) Bedrock Outcrop					1065.82	324.863			1065.82	324.863					Figure 6 (Bedrock Surface Contour) and Figure 7A (Isopach) maps
156	643586	4.74814e+06	DeSimone (2017) Bedrock Outcrop					1128.54	343.979			1128.54	343.979					Figure 6 (Bedrock Surface Contour) and Figure 7A (Isopach) maps
157	643610	4.74823e+06	DeSimone (2017) Bedrock Outcrop					1099.08	335			1099.08	335					Figure 6 (Bedrock Surface Contour) and Figure 7A (Isopach) maps
158	643485	4.74833e+06	DeSimone (2017) Bedrock Outcrop					1025.97	312.717			1025.97	312.717					Figure 6 (Bedrock Surface Contour) and Figure 7A (Isopach) maps
159	643649	4.74832e+06	DeSimone (2017) Bedrock Outcrop					1076.15	328.012			1076.15	328.012					Figure 6 (Bedrock Surface Contour) and Figure 7A (Isopach) maps
160	643647	4.74843e+06	DeSimone (2017) Bedrock Outcrop					1040.4	317.114			1040.4	317.114					Figure 6 (Bedrock Surface Contour) and Figure 7A (Isopach) maps
161	643803	4.74886e+06	DeSimone (2017) Bedrock Outcrop					936.634	285.486			936.634	285.486					Figure 6 (Bedrock Surface Contour) and Figure 7A (Isopach) maps
162	644303	4.75037e+06	DeSimone (2017) Bedrock Outcrop					883.878	269.406			883.878	269.406					Figure 6 (Bedrock Surface Contour) and Figure 7A (Isopach) maps
163	644226	4.75049e+06	DeSimone (2017) Bedrock Outcrop					966.352	294.544			966.352	294.544					Figure 6 (Bedrock Surface Contour) and Figure 7A (Isopach) maps
164	644819	4.75075e+06	DeSimone (2017) Bedrock Outcrop					639.242	194.841			639.242	194.841					Figure 6 (Bedrock Surface Contour) and Figure 7A (Isopach) maps
165	644583	4.75086e+06	DeSimone (2017) Bedrock Outcrop					751.719	229.124			751.719	229.124					Figure 6 (Bedrock Surface Contour) and Figure 7A (Isopach) maps
166	644599	4.75149e+06	DeSimone (2017) Bedrock Outcrop					744.931	227.055			744.931	227.055					Figure 6 (Bedrock Surface Contour) and Figure 7A (Isopach) maps
167	646236	4.75252e+06	DeSimone (2017) Bedrock Outcrop					734.452	223.861			734.452	223.861					Figure 6 (Bedrock Surface Contour) and Figure 7A (Isopach) maps
168	646242	4.75269e+06	DeSimone (2017) Bedrock Outcrop					765.886	233.442			765.886	233.442					Figure 6 (Bedrock Surface Contour) and Figure 7A (Isopach) maps
169	646593	4.75196e+06	DeSimone (2017) Bedrock Outcrop					682.572	208.048			682.572	208.048					Figure 6 (Bedrock Surface Contour) and Figure 7A (Isopach) maps
170	644536	4.7548e+06	DeSimone (2017) Bedrock Outcrop					692.467	211.064			692.467	211.064					Figure 6 (Bedrock Surface Contour) and Figure 7A (Isopach) maps
171	644728	4.75468e+06	DeSimone (2017) Bedrock Outcrop					674.911	205.713			674.911	205.713					Figure 6 (Bedrock Surface Contour) and Figure 7A (Isopach) maps
172	644824	4.75459e+06	DeSimone (2017) Bedrock Outcrop					680.213	207.329			680.213	207.329					Figure 6 (Bedrock Surface Contour) and Figure 7A (Isopach) maps
173	645098	4.75456e+06	DeSimone (2017) Bedrock Outcrop					703.809	214.521			703.809	214.521					Figure 6 (Bedrock Surface Contour) and Figure 7A (Isopach) maps
174	645111	4.75464e+06	DeSimone (2017) Bedrock Outcrop					701.326	213.764			701.326	213.764					Figure 6 (Bedrock Surface Contour) and Figure 7A (Isopach) maps
175	645138	4.7547e+06	DeSimone (2017) Bedrock Outcrop					713.852	217.582			713.852	217.582					Figure 6 (Bedrock Surface Contour) and Figure 7A (Isopach) maps
176	645211	4.75486e+06	DeSimone (2017) Bedrock Outcrop					713.35	217.429			713.35	217.429					Figure 6 (Bedrock Surface Contour) and Figure 7A (Isopach) maps
177	645224	4.75491e+06	DeSimone (2017) Bedrock Outcrop					695.656	212.036			695.656	212.036					Figure 6 (Bedrock Surface Contour) and Figure 7A (Isopach) maps
178	645326	4.75493e+06	DeSimone (2017) Bedrock Outcrop					721.312	219.856			721.312	219.856					Figure 6 (Bedrock Surface Contour) and Figure 7A (Isopach) maps
179	645363	4.75515e+06	DeSimone (2017) Bedrock Outcrop					759.58	231.52			759.58	231.52					Figure 6 (Bedrock Surface Contour) and Figure 7A (Isopach) maps
180	645822	4.75514e+06	DeSimone (2017) Bedrock Outcrop					760.289	231.736			760.289	231.736					Figure 6 (Bedrock Surface Contour) and Figure 7A (Isopach) maps
181	646563	4.75386e+06	DeSimone (2017) Bedrock Outcrop					899.629	274.207			899.629	274.207					Figure 6 (Bedrock Surface Contour) and Figure 7A (Isopach) maps
182	646563	4.75376e+06	DeSimone (2017) Bedrock Outcrop					916.791	279.438			916.791	279.438					Figure 6 (Bedrock Surface Contour) and Figure 7A (Isopach) maps
183	646623	4.75371e+06	DeSimone (2017) Bedrock Outcrop					894.14	272.534			894.14	272.534					Figure 6 (Bedrock Surface Contour) and Figure 7A (Isopach) maps
184	646540	4.7536e+06	DeSimone (2017) Bedrock Outcrop					887.254	270.435			887.254	270.435					Figure 6 (Bedrock Surface Contour) and Figure 7A (Isopach) maps
185	646966	4.75162e+06	DeSimone (2017) Bedrock Outcrop					706.453	215.327			706.453	215.327					Figure 6 (Bedrock Surface Contour) and Figure 7A (Isopach) maps
186	646331	4.74747e+06	DeSimone (2017) Bedrock Outcrop					827.644	252.266			827.644	252.266					Figure 6 (Bedrock Surface Contour) and Figure 7A (Isopach) maps
187	646305	4.74856e+06	DeSimone (2017) Bedrock Outcrop					777.365	236.941			777.365	236.941					Figure 6 (Bedrock Surface Contour) and Figure 7A (Isopach) maps
188	646612	4.74846e+06	DeSimone (2017) Bedrock Outcrop					751.398	229.026			751.398	229.026					Figure 6 (Bedrock Surface Contour) and Figure 7A (Isopach) maps
189	646606	4.7483e+06	DeSimone (2017) Bedrock Outcrop					745.951	227.366			745.951	227.366					Figure 6 (Bedrock Surface Contour) and Figure 7A (Isopach) maps
190	644640	4751354	Kim (2017)Bedrock Outcrop					680.118	207.3			680.118	207.3					Figure 6 (Bedrock Surface Contour) and Figure 7A (Isopach) maps
191	644636	4751383	Kim (2017)Bedrock Outcrop					690.6	210.495			690.6	210.495					Figure 6 (Bedrock Surface Contour) and Figure 7A (Isopach) maps
192	644620	4751438	Kim (2017)Bedrock Outcrop					715.899	218.206			715.899	218.206					Figure 6 (Bedrock Surface Contour) and Figure 7A (Isopach) maps
193	644595	4751392	Kim (2017)Bedrock Outcrop					739.964	225.541			739.964	225.541					Figure 6 (Bedrock Surface Contour) and Figure 7A (Isopach) maps
194	644618	4751388	Kim (2017)Bedrock Outcrop					712.612	217.204			712.612	217.204					Figure 6 (Bedrock Surface Contour) and Figure 7A (Isopach) maps
195	644626	4751364	Kim (2017)Bedrock Outcrop					706.168	215.24			706.168	215.24					Figure 6 (Bedrock Surface Contour) and Figure 7A (Isopach) maps
196	644605	4751358	Kim (2017)Bedrock Outcrop					729.784	222.438			729.784	222.438					Figure 6 (Bedrock Surface Contour) and Figure 7A (Isopach) maps
197	644585	4751369	Kim (2017)Bedrock Outcrop					765.427	233.302			765.427	233.302					Figure 6 (Bedrock Surface Contour) and Figure 7A (Isopach) maps
198	644592	4751379	Kim (2017)Bedrock Outcrop					750.341	228.704			750.341	228.704					Figure 6 (Bedrock Surface Contour) and Figure 7A (Isopach) maps
199	644586	4751397	Kim (2017)Bedrock Outcrop					755.236	230.196			755.236	230.196					Figure 6 (Bedrock Surface Contour) and Figure 7A (Isopach) maps
200	644617	4751396	Kim (2017)Bedrock Outcrop					713.743	217.549			713.743	217.549					Figure 6 (Bedrock Surface Contour) and Figure 7A (Isopach) maps
201	644610	4751408	Kim (2017)Bedrock Outcrop					715.374	218.046			715.374	218.046					Figure 6 (Bedrock Surface Contour) and Figure 7A (Isopach) maps
202	643423	4752876	Kim (2017)Bedrock Outcrop					604.823	184.35			604.823	184.35					Figure 6 (Bedrock Surface Contour) and Figure 7A (Isopach) maps
203	643419	4752895	Kim (2017)Bedrock Outcrop					609.308	185.717			609.308	185.717					Figure 6 (Bedrock Surface Contour) and Figure 7A (Isopach) maps
204	642824	4753974	Kim (2017)Bedrock Outcrop					729.209	222.263			729.209	222.263					Figure 6 (Bedrock Surface Contour) and Figure 7A (Isopach) maps
205	642781	4753846	Kim (2017)Bedrock Outcrop					743.009	226.469			743.009	226.469					Figure 6 (Bedrock Surface Contour) and Figure 7A (Isopach) maps
206	642777	4753779	Kim (2017)Bedrock Outcrop					749.688	228.505			749.688	228.505					Figure 6 (Bedrock Surface Contour) and Figure 7A (Isopach) maps
207	642836	4753779	Kim (2017)Bedrock Outcrop					739.514	225.404			739.514	225.404					Figure 6 (Bedrock Surface Contour) and Figure 7A (Isopach) maps
208	642814	4753729	Kim (2017)Bedrock Outcrop					749.154	228.342			749.154	228.342					Figure 6 (Bedrock Surface Contour) and Figure 7A (Isopach) maps
209	642758	4753070	Kim (2017)Bedrock Outcrop					716.765	218.47			716.765	218.47					Figure 6 (Bedrock Surface Contour) and Figure 7A (Isopach) maps
210	642720	4753188	Kim (2017)Bedrock Outcrop					757.907	231.01			757.907	231.01					Figure 6 (Bedrock Surface Contour) and Figure 7A (Isopach) maps
211	642734	4753236	Kim (2017)Bedrock Outcrop					776.266	236.606			776.266	236.606					Figure 6 (Bedrock Surface Contour) and Figure 7A (Isopach) maps
212	642777	4753312	Kim (2017)Bedrock Outcrop					773.297	235.701			773.297	235.701					Figure 6 (Bedrock Surface Contour) and Figure 7A (Isopach) maps
213	643048	4753515	Kim (2017)Bedrock Outcrop					572.995	174.649			572.995	174.649					Figure 6 (Bedrock Surface Contour) and Figure 7A (Isopach) maps
214	643058	4753651	Kim (2017)Bedrock Outcrop					572.818	174.595			572.818	174.595					Figure 6 (Bedrock Surface Contour) and Figure 7A (Isopach) maps
215	643057	4753640	Kim (2017)Bedrock Outcrop					573.281	174.736			573.281	174.736					Figure 6 (Bedrock Surface Contour) and Figure 7A (Isopach) maps
216	644486	4752949	Kim (2017)Bedrock Outcrop					634.272	193.326			634.272	193.326					Figure 6 (Bedrock Surface Contour) and Figure 7A (Isopach) maps
217	644498	4752948	Kim (2017)Bedrock Outcrop					642.087	195.708			642.087	195.708					Figure 6 (Bedrock Surface Contour) and Figure 7A (Isopach) maps
218	644505	4752946	Kim (2017)Bedrock Outcrop					645.653	196.795			645.653	196.795					Figure 6 (Bedrock Surface Contour) and Figure 7A (Isopach) maps
219	643242	4754000	Kim (2017)Bedrock Outcrop					585.21	178.372			585.21	178.372					Figure 6 (Bedrock Surface Contour) and Figure 7A (Isopach) maps
220	643311	4754151	Kim (2017)Bedrock Outcrop					584.744	178.23			584.744	178.23					Figure 6 (Bedrock Surface Contour) and Figure 7A (Isopach) maps
221	643391	4754278	Kim (2017)Bedrock Outcrop					579.593	176.66			579.593	176.66					Figure 6 (Bedrock Surface Contour) and Figure 7A (Isopach) maps
222	642651	4753724	Kim (2017)Bedrock Outcrop					758.094	231.067			758.094	231.067					Figure 6 (Bedrock Surface Contour) and Figure 7A (Isopach) maps
223	642531	4753816	Kim (2017)Bedrock Outcrop					722.812	220.313			722.812	220.313					Figure 6 (Bedrock Surface Contour) and Figure 7A (Isopach) maps
224	642284	4754127	Kim (2017)Bedrock Outcrop					733.898	223.692			733.898	223.692					Figure 6 (Bedrock Surface Contour) and Figure 7A (Isopach) maps
225	643213	4753500	Kim (2017)Bedrock Outcrop					578.038	176.186			578.038	176.186					Figure 6 (Bedrock Surface Contour) and Figure 7A (Isopach) maps
226	643194	4753510	Kim (2017)Bedrock Outcrop					561.096	171.022			561.096	171.022					Figure 6 (Bedrock Surface Contour) and Figure 7A (Isopach) maps
227	643190	4753008	Kim (2017)Bedrock Outcrop					544.013	165.815			544.013	165.815					Figure 6 (Bedrock Surface Contour) and Figure 7A (Isopach) maps
228	643224	4753526	Kim (2017)Bedrock Outcrop					574.915	175.234			574.915	175.234					Figure 6 (Bedrock Surface Contour) and Figure 7A (Isopach) maps
229	642659	4753132	Kim (2017)Bedrock Outcrop					787.224	239.946			787.224	239.946					Figure 6 (Bedrock Surface Contour) and Figure 7A (Isopach) maps
230	642645	4753167	Kim (2017)Bedrock Outcrop					799.285	243.622			799.285	243.622					Figure 6 (Bedrock Surface Contour) and Figure 7A (Isopach) maps
231	642642	4753194	Kim (2017)Bedrock Outcrop					789.416	240.614			789.416	240.614					Figure 6 (Bedrock Surface Contour) and Figure 7A (Isopach) maps
232	642616	4753238	Kim (2017)Bedrock Outcrop					820.243	250.01			820.243	250.01					Figure 6 (Bedrock Surface Contour) and Figure 7A (Isopach) maps
233	642540	4753270	Kim (2017)Bedrock Outcrop					787.572	240.052			787.572	240.052					Figure 6 (Bedrock Surface Contour) and Figure 7A (Isopach) maps
234	642525	4753288	Kim (2017)Bedrock Outcrop					771.942	235.288			771.942	235.288					Figure 6 (Bedrock Surface Contour) and Figure 7A (Isopach) maps
235	642456	4753296	Kim (2017)Bedrock Outcrop					749.57	228.469			749.57	228.469					Figure 6 (Bedrock Surface Contour) and Figure 7A (Isopach) maps
236	642455	4753603	Kim (2017)Bedrock Outcrop					722.218	220.132			722.218	220.132					Figure 6 (Bedrock Surface Contour) and Figure 7A (Isopach) maps
237	642472	4753648	Kim (2017)Bedrock Outcrop					725.873	221.246			725.873	221.246					Figure 6 (Bedrock Surface Contour) and Figure 7A (Isopach) maps
238	642743	4753342	Kim (2017)Bedrock Outcrop					796.768	242.855			796.768	242.855					Figure 6 (Bedrock Surface Contour) and Figure 7A (Isopach) maps
239	642786	4753309	Kim (2017)Bedrock Outcrop					761.923	232.234			761.923	232.234					Figure 6 (Bedrock Surface Contour) and Figure 7A (Isopach) maps
240	642853	4753330	Kim (2017)Bedrock Outcrop					698.714	212.968			698.714	212.968					Figure 6 (Bedrock Surface Contour) and Figure 7A (Isopach) maps
241	642840	4753379	Kim (2017)Bedrock Outcrop					745.253	227.153			745.253	227.153					Figure 6 (Bedrock Surface Contour) and Figure 7A (Isopach) maps
242	642814	4753321	Kim (2017)Bedrock Outcrop					747.995	227.989			747.995	227.989					Figure 6 (Bedrock Surface Contour) and Figure 7A (Isopach) maps
243	642281	4754108	Kim (2017)Bedrock Outcrop					738.425	225.072			738.425	225.072					Figure 6 (Bedrock Surface Contour) and Figure 7A (Isopach) maps
244	642260	4754072	Kim (2017)Bedrock Outcrop					748.514	228.147			748.514	228.147					Figure 6 (Bedrock Surface Contour) and Figure 7A (Isopach) maps
245	642102	4753992	Kim (2017)Bedrock Outcrop					785.364	239.379			785.364	239.379					Figure 6 (Bedrock Surface Contour) and Figure 7A (Isopach) maps
246	642135	4753842	Kim (2017)Bedrock Outcrop					750.112	228.634			750.112	228.634					Figure 6 (Bedrock Surface Contour) and Figure 7A (Isopach) maps
247	642226	4753766	Kim (2017)Bedrock Outcrop					729.357	222.308			729.357	222.308					Figure 6 (Bedrock Surface Contour) and Figure 7A (Isopach) maps
248	642235	4753799	Kim (2017)Bedrock Outcrop					732.904	223.389			732.904	223.389					Figure 6 (Bedrock Surface Contour) and Figure 7A (Isopach) maps
249	642226	4753758	Kim (2017)Bedrock Outcrop					729.357	222.308			729.357	222.308					Figure 6 (Bedrock Surface Contour) and Figure 7A (Isopach) maps
250	642525	4753713	Kim (2017)Bedrock Outcrop					740.23	225.622			740.23	225.622					Figure 6 (Bedrock Surface Contour) and Figure 7A (Isopach) maps
251	642551	4753764	Kim (2017)Bedrock Outcrop					742.818	226.411			742.818	226.411					Figure 6 (Bedrock Surface Contour) and Figure 7A (Isopach) maps
252	641861	4751692	Kim (2017)Bedrock Outcrop					692.867	211.186			692.867	211.186					Figure 6 (Bedrock Surface Contour) and Figure 7A (Isopach) maps
253	641871	4751696	Kim (2017)Bedrock Outcrop					692.263	211.002			692.263	211.002					Figure 6 (Bedrock Surface Contour) and Figure 7A (Isopach) maps
254	642003	4751697	Kim (2017)Bedrock Outcrop					672.746	205.053			672.746	205.053					Figure 6 (Bedrock Surface Contour) and Figure 7A (Isopach) maps
255	641994	4751717	Kim (2017)Bedrock Outcrop					675.528	205.901			675.528	205.901					Figure 6 (Bedrock Surface Contour) and Figure 7A (Isopach) maps
256	641927	4751659	Kim (2017)Bedrock Outcrop					703.372	214.388			703.372	214.388					Figure 6 (Bedrock Surface Contour) and Figure 7A (Isopach) maps
257	641797	4751677	Kim (2017)Bedrock Outcrop					681.846	207.827			681.846	207.827					Figure 6 (Bedrock Surface Contour) and Figure 7A (Isopach) maps
258	641629	4751047	Kim (2017)Bedrock Outcrop					798.035	243.241			798.035	243.241					Figure 6 (Bedrock Surface Contour) and Figure 7A (Isopach) maps
259	641363	4750841	Kim (2017)Bedrock Outcrop					833.907	254.175			833.907	254.175					Figure 6 (Bedrock Surface Contour) and Figure 7A (Isopach) maps
260	641374	4750852	Kim (2017)Bedrock Outcrop					829.156	252.727			829.156	252.727					Figure 6 (Bedrock Surface Contour) and Figure 7A (Isopach) maps
261	641383	4750857	Kim (2017)Bedrock Outcrop					829.48	252.825			829.48	252.825					Figure 6 (Bedrock Surface Contour) and Figure 7A (Isopach) maps
262	641384	4750865	Kim (2017)Bedrock Outcrop					831.704	253.503			831.704	253.503					Figure 6 (Bedrock Surface Contour) and Figure 7A (Isopach) maps
263	641401	4750874	Kim (2017)Bedrock Outcrop					824.789	251.396			824.789	251.396					Figure 6 (Bedrock Surface Contour) and Figure 7A (Isopach) maps
264	641406	4750886	Kim (2017)Bedrock Outcrop					829.306	252.773			829.306	252.773					Figure 6 (Bedrock Surface Contour) and Figure 7A (Isopach) maps
265	641414	4750890	Kim (2017)Bedrock Outcrop					827.569	252.243			827.569	252.243					Figure 6 (Bedrock Surface Contour) and Figure 7A (Isopach) maps
266	641428	4750890	Kim (2017)Bedrock Outcrop					824.44	251.289			824.44	251.289					Figure 6 (Bedrock Surface Contour) and Figure 7A (Isopach) maps
267	641438	4750895	Kim (2017)Bedrock Outcrop					846.07	257.882			846.07	257.882					Figure 6 (Bedrock Surface Contour) and Figure 7A (Isopach) maps
268	641445	4750905	Kim (2017)Bedrock Outcrop					823.843	251.107			823.843	251.107					Figure 6 (Bedrock Surface Contour) and Figure 7A (Isopach) maps
269	641451	4750913	Kim (2017)Bedrock Outcrop					824.113	251.19			824.113	251.19					Figure 6 (Bedrock Surface Contour) and Figure 7A (Isopach) maps
270	641458	4750916	Kim (2017)Bedrock Outcrop					838.036	255.433			838.036	255.433					Figure 6 (Bedrock Surface Contour) and Figure 7A (Isopach) maps
271	641466	4750920	Kim (2017)Bedrock Outcrop					858.469	261.661			858.469	261.661					Figure 6 (Bedrock Surface Contour) and Figure 7A (Isopach) maps
272	641470	4750923	Kim (2017)Bedrock Outcrop					851.156	259.432			851.156	259.432					Figure 6 (Bedrock Surface Contour) and Figure 7A (Isopach) maps
273	641470	4750929	Kim (2017)Bedrock Outcrop					818.92	249.607			818.92	249.607					Figure 6 (Bedrock Surface Contour) and Figure 7A (Isopach) maps
274	641476	4750938	Kim (2017)Bedrock Outcrop					818.819	249.576			818.819	249.576					Figure 6 (Bedrock Surface Contour) and Figure 7A (Isopach) maps
275	641476	4750940	Kim (2017)Bedrock Outcrop					820.252	250.013			820.252	250.013					Figure 6 (Bedrock Surface Contour) and Figure 7A (Isopach) maps
276	641487	4750944	Kim (2017)Bedrock Outcrop					816.02	248.723			816.02	248.723					Figure 6 (Bedrock Surface Contour) and Figure 7A (Isopach) maps
277	641504	4750949	Kim (2017)Bedrock Outcrop					835.469	254.651			835.469	254.651					Figure 6 (Bedrock Surface Contour) and Figure 7A (Isopach) maps
278	641511	4750963	Kim (2017)Bedrock Outcrop					812.094	247.526			812.094	247.526					Figure 6 (Bedrock Surface Contour) and Figure 7A (Isopach) maps
279	641518	4750970	Kim (2017)Bedrock Outcrop					811.918	247.473			811.918	247.473					Figure 6 (Bedrock Surface Contour) and Figure 7A (Isopach) maps
280	641533	4750982	Kim (2017)Bedrock Outcrop					809.922	246.864			809.922	246.864					Figure 6 (Bedrock Surface Contour) and Figure 7A (Isopach) maps
281	641533	4750982	Kim (2017)Bedrock Outcrop					809.922	246.864			809.922	246.864					Figure 6 (Bedrock Surface Contour) and Figure 7A (Isopach) maps
282	641560	4751004	Kim (2017)Bedrock Outcrop					812.098	247.527			812.098	247.527					Figure 6 (Bedrock Surface Contour) and Figure 7A (Isopach) maps
283	641577	4751002	Kim (2017)Bedrock Outcrop					825.021	251.466			825.021	251.466					Figure 6 (Bedrock Surface Contour) and Figure 7A (Isopach) maps
284	641575	4751011	Kim (2017)Bedrock Outcrop					804.369	245.172			804.369	245.172					Figure 6 (Bedrock Surface Contour) and Figure 7A (Isopach) maps
285	641589	4751015	Kim (2017)Bedrock Outcrop					806.133	245.709			806.133	245.709					Figure 6 (Bedrock Surface Contour) and Figure 7A (Isopach) maps
286	641596	4751019	Kim (2017)Bedrock Outcrop					805.039	245.376			805.039	245.376					Figure 6 (Bedrock Surface Contour) and Figure 7A (Isopach) maps
287	641604	4751029	Kim (2017)Bedrock Outcrop					800.678	244.047			800.678	244.047					Figure 6 (Bedrock Surface Contour) and Figure 7A (Isopach) maps
288	641615	4751031	Kim (2017)Bedrock Outcrop					815.041	248.424			815.041	248.424					Figure 6 (Bedrock Surface Contour) and Figure 7A (Isopach) maps
289	641612	4751040	Kim (2017)Bedrock Outcrop					800.444	243.975			800.444	243.975					Figure 6 (Bedrock Surface Contour) and Figure 7A (Isopach) maps
290	644584	4752945	Kim (2017)Bedrock Outcrop					641.417	195.504			641.417	195.504					Figure 6 (Bedrock Surface Contour) and Figure 7A (Isopach) maps
291	644583	4752959	Kim (2017)Bedrock Outcrop					637.405	194.281			637.405	194.281					Figure 6 (Bedrock Surface Contour) and Figure 7A (Isopach) maps
292	644557	4752962	Kim (2017)Bedrock Outcrop					639.567	194.94			639.567	194.94					Figure 6 (Bedrock Surface Contour) and Figure 7A (Isopach) maps
293	644544	4752974	Kim (2017)Bedrock Outcrop					638.399	194.584			638.399	194.584					Figure 6 (Bedrock Surface Contour) and Figure 7A (Isopach) maps
294	644526	4752972	Kim (2017)Bedrock Outcrop					637.51	194.313			637.51	194.313					Figure 6 (Bedrock Surface Contour) and Figure 7A (Isopach) maps
295	644451	4752959	Kim (2017)Bedrock Outcrop					607.293	185.103			607.293	185.103					Figure 6 (Bedrock Surface Contour) and Figure 7A (Isopach) maps
296	644463	4752968	Kim (2017)Bedrock Outcrop					620.525	189.136			620.525	189.136					Figure 6 (Bedrock Surface Contour) and Figure 7A (Isopach) maps
297	644504	4752965	Kim (2017)Bedrock Outcrop					637.923	194.439			637.923	194.439					Figure 6 (Bedrock Surface Contour) and Figure 7A (Isopach) maps
298	646407	4750720	Kim (2017)Bedrock Outcrop					597.021	181.972			597.021	181.972					Figure 6 (Bedrock Surface Contour) and Figure 7A (Isopach) maps
299	646414	4750703	Kim (2017)Bedrock Outcrop					598.327	182.37			598.327	182.37					Figure 6 (Bedrock Surface Contour) and Figure 7A (Isopach) maps
300	646418	4750700	Kim (2017)Bedrock Outcrop					598.714	182.488			598.714	182.488					Figure 6 (Bedrock Surface Contour) and Figure 7A (Isopach) maps
301	644719	4754577	Kim (2017)Bedrock Outcrop					660.587	201.347			660.587	201.347					Figure 6 (Bedrock Surface Contour) and Figure 7A (Isopach) maps
302	644655	4754610	Kim (2017)Bedrock Outcrop					658.944	200.846			658.944	200.846					Figure 6 (Bedrock Surface Contour) and Figure 7A (Isopach) maps
303	646996	4751144	Kim (2017)Bedrock Outcrop					669.905	204.187			669.905	204.187					Figure 6 (Bedrock Surface Contour) and Figure 7A (Isopach) maps
304	647002	4751169	Kim (2017)Bedrock Outcrop					695.728	212.058			695.728	212.058					Figure 6 (Bedrock Surface Contour) and Figure 7A (Isopach) maps
305	647014	4751203	Kim (2017)Bedrock Outcrop					705.194	214.943			705.194	214.943					Figure 6 (Bedrock Surface Contour) and Figure 7A (Isopach) maps
306	646996	4751226	Kim (2017)Bedrock Outcrop					681.125	207.607			681.125	207.607					Figure 6 (Bedrock Surface Contour) and Figure 7A (Isopach) maps
307	647005	4751516	Kim (2017)Bedrock Outcrop					685.266	208.869			685.266	208.869					Figure 6 (Bedrock Surface Contour) and Figure 7A (Isopach) maps
308	647107	4751495	Kim (2017)Bedrock Outcrop					697.375	212.56			697.375	212.56					Figure 6 (Bedrock Surface Contour) and Figure 7A (Isopach) maps
309	646632	4751938	Kim (2017)Bedrock Outcrop					658.839	200.814			658.839	200.814					Figure 6 (Bedrock Surface Contour) and Figure 7A (Isopach) maps
310	646605	4751946	Kim (2017)Bedrock Outcrop					664.137	202.429			664.137	202.429					Figure 6 (Bedrock Surface Contour) and Figure 7A (Isopach) maps
311	646590	4751948	Kim (2017)Bedrock Outcrop					653.278	199.119			653.278	199.119					Figure 6 (Bedrock Surface Contour) and Figure 7A (Isopach) maps
312	646568	4751960	Kim (2017)Bedrock Outcrop					662.208	201.841			662.208	201.841					Figure 6 (Bedrock Surface Contour) and Figure 7A (Isopach) maps
313	646538	4751964	Kim (2017)Bedrock Outcrop					654.61	199.525			654.61	199.525					Figure 6 (Bedrock Surface Contour) and Figure 7A (Isopach) maps
314	646537	4751965	Kim (2017)Bedrock Outcrop					651.293	198.514			651.293	198.514					Figure 6 (Bedrock Surface Contour) and Figure 7A (Isopach) maps
315	646516	4751969	Kim (2017)Bedrock Outcrop					647.559	197.376			647.559	197.376					Figure 6 (Bedrock Surface Contour) and Figure 7A (Isopach) maps
316	646493	4751977	Kim (2017)Bedrock Outcrop					649.665	198.018			649.665	198.018					Figure 6 (Bedrock Surface Contour) and Figure 7A (Isopach) maps
317	646265	4752476	Kim (2017)Bedrock Outcrop					730.961	222.797			730.961	222.797					Figure 6 (Bedrock Surface Contour) and Figure 7A (Isopach) maps
318	646268	4752491	Kim (2017)Bedrock Outcrop					736.841	224.589			736.841	224.589					Figure 6 (Bedrock Surface Contour) and Figure 7A (Isopach) maps
319	646265	4752504	Kim (2017)Bedrock Outcrop					735.528	224.189			735.528	224.189					Figure 6 (Bedrock Surface Contour) and Figure 7A (Isopach) maps
320	646272	4752514	Kim (2017)Bedrock Outcrop					758.694	231.25			758.694	231.25					Figure 6 (Bedrock Surface Contour) and Figure 7A (Isopach) maps
321	646263	4752521	Kim (2017)Bedrock Outcrop					737.5	224.79			737.5	224.79					Figure 6 (Bedrock Surface Contour) and Figure 7A (Isopach) maps
322	646263	4752542	Kim (2017)Bedrock Outcrop					740.128	225.591			740.128	225.591					Figure 6 (Bedrock Surface Contour) and Figure 7A (Isopach) maps
323	646261	4752555	Kim (2017)Bedrock Outcrop					742.982	226.461			742.982	226.461					Figure 6 (Bedrock Surface Contour) and Figure 7A (Isopach) maps
324	646263	4752566	Kim (2017)Bedrock Outcrop					744.327	226.871			744.327	226.871					Figure 6 (Bedrock Surface Contour) and Figure 7A (Isopach) maps
325	646253	4752513	Kim (2017)Bedrock Outcrop					739.354	225.355			739.354	225.355					Figure 6 (Bedrock Surface Contour) and Figure 7A (Isopach) maps
326	646254	4752627	Kim (2017)Bedrock Outcrop					756.148	230.474			756.148	230.474					Figure 6 (Bedrock Surface Contour) and Figure 7A (Isopach) maps
327	646260	4752659	Kim (2017)Bedrock Outcrop					758.95	231.328			758.95	231.328					Figure 6 (Bedrock Surface Contour) and Figure 7A (Isopach) maps
328	646251	4752682	Kim (2017)Bedrock Outcrop					764.997	233.171			764.997	233.171					Figure 6 (Bedrock Surface Contour) and Figure 7A (Isopach) maps
329	646253	4752718	Kim (2017)Bedrock Outcrop					769.829	234.644			769.829	234.644					Figure 6 (Bedrock Surface Contour) and Figure 7A (Isopach) maps
330	646500	4753662	Kim (2017)Bedrock Outcrop					895.433	272.928			895.433	272.928					Figure 6 (Bedrock Surface Contour) and Figure 7A (Isopach) maps
331	646516	4753649	Kim (2017)Bedrock Outcrop					879.849	268.178			879.849	268.178					Figure 6 (Bedrock Surface Contour) and Figure 7A (Isopach) maps
332	646539	4753643	Kim (2017)Bedrock Outcrop					883.179	269.193			883.179	269.193					Figure 6 (Bedrock Surface Contour) and Figure 7A (Isopach) maps
333	646558	4753646	Kim (2017)Bedrock Outcrop					887.871	270.623			887.871	270.623					Figure 6 (Bedrock Surface Contour) and Figure 7A (Isopach) maps
334	646569	4753665	Kim (2017)Bedrock Outcrop					910.535	277.531			910.535	277.531					Figure 6 (Bedrock Surface Contour) and Figure 7A (Isopach) maps
335	646590	4753679	Kim (2017)Bedrock Outcrop					898.921	273.991			898.921	273.991					Figure 6 (Bedrock Surface Contour) and Figure 7A (Isopach) maps
336	646599	4753723	Kim (2017)Bedrock Outcrop					921.69	280.931			921.69	280.931					Figure 6 (Bedrock Surface Contour) and Figure 7A (Isopach) maps
337	646609	4753738	Kim (2017)Bedrock Outcrop					888.314	270.758			888.314	270.758					Figure 6 (Bedrock Surface Contour) and Figure 7A (Isopach) maps
338	646609	4753836	Kim (2017)Bedrock Outcrop					917.936	279.787			917.936	279.787					Figure 6 (Bedrock Surface Contour) and Figure 7A (Isopach) maps
339	646569	4753830	Kim (2017)Bedrock Outcrop					876.667	267.208			876.667	267.208					Figure 6 (Bedrock Surface Contour) and Figure 7A (Isopach) maps
340	644125	4752648	Kim (2017)Bedrock Outcrop					545.65	166.314			545.65	166.314					Figure 6 (Bedrock Surface Contour) and Figure 7A (Isopach) maps
341	644073	4752620	Kim (2017)Bedrock Outcrop					548.629	167.222			548.629	167.222					Figure 6 (Bedrock Surface Contour) and Figure 7A (Isopach) maps
342	644060	4752596	Kim (2017)Bedrock Outcrop					544.314	165.907			544.314	165.907					Figure 6 (Bedrock Surface Contour) and Figure 7A (Isopach) maps
343	644067	4752587	Kim (2017)Bedrock Outcrop					547.661	166.927			547.661	166.927					Figure 6 (Bedrock Surface Contour) and Figure 7A (Isopach) maps
344	645118	4754698	Kim (2017)Bedrock Outcrop					693.264	211.307			693.264	211.307					Figure 6 (Bedrock Surface Contour) and Figure 7A (Isopach) maps
345	645116	4754782	Kim (2017)Bedrock Outcrop					671.119	204.557			671.119	204.557					Figure 6 (Bedrock Surface Contour) and Figure 7A (Isopach) maps
346	645172	4754868	Kim (2017)Bedrock Outcrop					695.61	212.022			695.61	212.022					Figure 6 (Bedrock Surface Contour) and Figure 7A (Isopach) maps
347	644801	4751257	Kim (2017)Bedrock Outcrop					657.969	200.549			657.969	200.549					Figure 6 (Bedrock Surface Contour) and Figure 7A (Isopach) maps
348	644801	4751256	Kim (2017)Bedrock Outcrop					657.969	200.549			657.969	200.549					Figure 6 (Bedrock Surface Contour) and Figure 7A (Isopach) maps
349	644812	4751261	Kim (2017)Bedrock Outcrop					647.749	197.434			647.749	197.434					Figure 6 (Bedrock Surface Contour) and Figure 7A (Isopach) maps
350	644815	4751192	Kim (2017)Bedrock Outcrop					673.356	205.239			673.356	205.239					Figure 6 (Bedrock Surface Contour) and Figure 7A (Isopach) maps
351	642447	4752972	Kim (2017)Bedrock Outcrop					615.932	187.736			615.932	187.736					Figure 6 (Bedrock Surface Contour) and Figure 7A (Isopach) maps
352	641061	4751711	Kim (2017)Bedrock Outcrop					699.642	213.251			699.642	213.251					Figure 6 (Bedrock Surface Contour) and Figure 7A (Isopach) maps
353	640831	4751681	Kim (2017)Bedrock Outcrop					804.185	245.115			804.185	245.115					Figure 6 (Bedrock Surface Contour) and Figure 7A (Isopach) maps
354	640834	4751711	Kim (2017)Bedrock Outcrop					810.853	247.148			810.853	247.148					Figure 6 (Bedrock Surface Contour) and Figure 7A (Isopach) maps
355	640808	4751701	Kim (2017)Bedrock Outcrop					827.569	252.243			827.569	252.243					Figure 6 (Bedrock Surface Contour) and Figure 7A (Isopach) maps
356	640808	4751701	Kim (2017)Bedrock Outcrop					827.569	252.243			827.569	252.243					Figure 6 (Bedrock Surface Contour) and Figure 7A (Isopach) maps
357	640803	4751736	Kim (2017)Bedrock Outcrop					838.806	255.668			838.806	255.668					Figure 6 (Bedrock Surface Contour) and Figure 7A (Isopach) maps
358	640758	4751759	Kim (2017)Bedrock Outcrop					849.453	258.913			849.453	258.913					Figure 6 (Bedrock Surface Contour) and Figure 7A (Isopach) maps
359	641060	4751731	Kim (2017)Bedrock Outcrop					700.093	213.388			700.093	213.388					Figure 6 (Bedrock Surface Contour) and Figure 7A (Isopach) maps
360	641038	4751717	Kim (2017)Bedrock Outcrop					713.174	217.376			713.174	217.376					Figure 6 (Bedrock Surface Contour) and Figure 7A (Isopach) maps
361	641035	4751690	Kim (2017)Bedrock Outcrop					715.479	218.078			715.479	218.078					Figure 6 (Bedrock Surface Contour) and Figure 7A (Isopach) maps
362	644362	4750395	Kim (2017)Bedrock Outcrop					842.953	256.932			842.953	256.932					Figure 6 (Bedrock Surface Contour) and Figure 7A (Isopach) maps
363	644250	4750464	Kim (2017)Bedrock Outcrop					961.299	293.004			961.299	293.004					Figure 6 (Bedrock Surface Contour) and Figure 7A (Isopach) maps
364	644703	4751149	Kim (2017)Bedrock Outcrop					715.623	218.122			715.623	218.122					Figure 6 (Bedrock Surface Contour) and Figure 7A (Isopach) maps
365	644703	4751149	Kim (2017)Bedrock Outcrop					715.623	218.122			715.623	218.122					Figure 6 (Bedrock Surface Contour) and Figure 7A (Isopach) maps
366	644769	4751149	Kim (2017)Bedrock Outcrop					703.937	214.56			703.937	214.56					Figure 6 (Bedrock Surface Contour) and Figure 7A (Isopach) maps
367	644773	4751085	Kim (2017)Bedrock Outcrop					697.946	212.734			697.946	212.734					Figure 6 (Bedrock Surface Contour) and Figure 7A (Isopach) maps
368	644582	4750904	Kim (2017)Bedrock Outcrop					763.409	232.687			763.409	232.687					Figure 6 (Bedrock Surface Contour) and Figure 7A (Isopach) maps
369	644664	4754673	Kim (2017)Bedrock Outcrop					663.901	202.357			663.901	202.357					Figure 6 (Bedrock Surface Contour) and Figure 7A (Isopach) maps
370	644754	4754675	Kim (2017)Bedrock Outcrop					681.204	207.631			681.204	207.631					Figure 6 (Bedrock Surface Contour) and Figure 7A (Isopach) maps
371	644799	4754594	Kim (2017)Bedrock Outcrop					669.117	203.947			669.117	203.947					Figure 6 (Bedrock Surface Contour) and Figure 7A (Isopach) maps
372	644825	4754594	Kim (2017)Bedrock Outcrop					680.423	207.393			680.423	207.393					Figure 6 (Bedrock Surface Contour) and Figure 7A (Isopach) maps
373	645115	4754701	Kim (2017)Bedrock Outcrop					688.76	209.934			688.76	209.934					Figure 6 (Bedrock Surface Contour) and Figure 7A (Isopach) maps
374	645089	4754730	Kim (2017)Bedrock Outcrop					663.99	202.384			663.99	202.384					Figure 6 (Bedrock Surface Contour) and Figure 7A (Isopach) maps
375	645239	4754893	Kim (2017)Bedrock Outcrop					710.354	216.516			710.354	216.516					Figure 6 (Bedrock Surface Contour) and Figure 7A (Isopach) maps
376	645241	4754904	Kim (2017)Bedrock Outcrop					708.153	215.845			708.153	215.845					Figure 6 (Bedrock Surface Contour) and Figure 7A (Isopach) maps
377	645226	4754937	Kim (2017)Bedrock Outcrop					698.586	212.929			698.586	212.929					Figure 6 (Bedrock Surface Contour) and Figure 7A (Isopach) maps
378	645453	4755047	Kim (2017)Bedrock Outcrop					740.328	225.652			740.328	225.652					Figure 6 (Bedrock Surface Contour) and Figure 7A (Isopach) maps
379	645838	4755246	Kim (2017)Bedrock Outcrop					757.789	230.974			757.789	230.974					Figure 6 (Bedrock Surface Contour) and Figure 7A (Isopach) maps
380	641679	4753645	Kim (2017)Bedrock Outcrop					630.144	192.068			630.144	192.068					Figure 6 (Bedrock Surface Contour) and Figure 7A (Isopach) maps
381	642017	4753326	Kim (2017)Bedrock Outcrop					618.635	188.56			618.635	188.56					Figure 6 (Bedrock Surface Contour) and Figure 7A (Isopach) maps
382	642370	4753170	Kim (2017)Bedrock Outcrop					707.329	215.594			707.329	215.594					Figure 6 (Bedrock Surface Contour) and Figure 7A (Isopach) maps
383	642414	4753214	Kim (2017)Bedrock Outcrop					756.444	230.564			756.444	230.564					Figure 6 (Bedrock Surface Contour) and Figure 7A (Isopach) maps
384	642424	4753146	Kim (2017)Bedrock Outcrop					749.652	228.494			749.652	228.494					Figure 6 (Bedrock Surface Contour) and Figure 7A (Isopach) maps
385	642425	4753052	Kim (2017)Bedrock Outcrop					681.637	207.763			681.637	207.763					Figure 6 (Bedrock Surface Contour) and Figure 7A (Isopach) maps
386	641394	4.75451e+06	Potter (1971) Bedrock Outcrop					510.002	155.449			510.002	155.449					Figure 6 (Bedrock Surface Contour) and Figure 7A (Isopach) maps
387	641632	4.75499e+06	Potter (1971) Bedrock Outcrop					511.484	155.9			511.484	155.9					Figure 6 (Bedrock Surface Contour) and Figure 7A (Isopach) maps
388	641900	4.75482e+06	Potter (1971) Bedrock Outcrop					638.521	194.621			638.521	194.621					Figure 6 (Bedrock Surface Contour) and Figure 7A (Isopach) maps
389	642188	4.75486e+06	Potter (1971) Bedrock Outcrop					758.284	231.125			758.284	231.125					Figure 6 (Bedrock Surface Contour) and Figure 7A (Isopach) maps
390	642068	4.75505e+06	Potter (1971) Bedrock Outcrop					667.313	203.397			667.313	203.397					Figure 6 (Bedrock Surface Contour) and Figure 7A (Isopach) maps
391	642248	4.75519e+06	Potter (1971) Bedrock Outcrop					663.629	202.274			663.629	202.274					Figure 6 (Bedrock Surface Contour) and Figure 7A (Isopach) maps
392	642434	4.75519e+06	Potter (1971) Bedrock Outcrop					662.142	201.821			662.142	201.821					Figure 6 (Bedrock Surface Contour) and Figure 7A (Isopach) maps
393	642414	4.75504e+06	Potter (1971) Bedrock Outcrop					671.25	204.597			671.25	204.597					Figure 6 (Bedrock Surface Contour) and Figure 7A (Isopach) maps
394	642630	4.75495e+06	Potter (1971) Bedrock Outcrop					694.616	211.719			694.616	211.719					Figure 6 (Bedrock Surface Contour) and Figure 7A (Isopach) maps
395	642816	4.75478e+06	Potter (1971) Bedrock Outcrop					656.191	200.007			656.191	200.007					Figure 6 (Bedrock Surface Contour) and Figure 7A (Isopach) maps
396	642744	4.75413e+06	Potter (1971) Bedrock Outcrop					720.295	219.546			720.295	219.546					Figure 6 (Bedrock Surface Contour) and Figure 7A (Isopach) maps
397	642547	4.7541e+06	Potter (1971) Bedrock Outcrop					696.109	212.174			696.109	212.174					Figure 6 (Bedrock Surface Contour) and Figure 7A (Isopach) maps
398	642196	4.75391e+06	Potter (1971) Bedrock Outcrop					759.918	231.623			759.918	231.623					Figure 6 (Bedrock Surface Contour) and Figure 7A (Isopach) maps
399	642090	4.75418e+06	Potter (1971) Bedrock Outcrop					733.868	223.683			733.868	223.683					Figure 6 (Bedrock Surface Contour) and Figure 7A (Isopach) maps
400	640930	4.75457e+06	Potter (1971) Bedrock Outcrop					642.95	195.971			642.95	195.971					Figure 6 (Bedrock Surface Contour) and Figure 7A (Isopach) maps
401	640839	4.75418e+06	Potter (1971) Bedrock Outcrop					518.658	158.087			518.658	158.087					Figure 6 (Bedrock Surface Contour) and Figure 7A (Isopach) maps
402	640930	4.75431e+06	Potter (1971) Bedrock Outcrop					554.352	168.967			554.352	168.967					Figure 6 (Bedrock Surface Contour) and Figure 7A (Isopach) maps
403	640997	4.75438e+06	Potter (1971) Bedrock Outcrop					579.811	176.726			579.811	176.726					Figure 6 (Bedrock Surface Contour) and Figure 7A (Isopach) maps
404	641991	4.75539e+06	Potter (1971) Bedrock Outcrop					543.83	165.76			543.83	165.76					Figure 6 (Bedrock Surface Contour) and Figure 7A (Isopach) maps
405	642085	4.75366e+06	Potter (1971) Bedrock Outcrop					728.465	222.036			728.465	222.036					Figure 6 (Bedrock Surface Contour) and Figure 7A (Isopach) maps
406	640930	4.75325e+06	Potter (1971) Bedrock Outcrop					581.931	177.372			581.931	177.372					Figure 6 (Bedrock Surface Contour) and Figure 7A (Isopach) maps
407	641808	4.75381e+06	Potter (1971) Bedrock Outcrop					695.236	211.908			695.236	211.908					Figure 6 (Bedrock Surface Contour) and Figure 7A (Isopach) maps
408	641639	4.75364e+06	Potter (1971) Bedrock Outcrop					621.267	189.362			621.267	189.362					Figure 6 (Bedrock Surface Contour) and Figure 7A (Isopach) maps
409	641578	4.75352e+06	Potter (1971) Bedrock Outcrop					574.716	175.173			574.716	175.173					Figure 6 (Bedrock Surface Contour) and Figure 7A (Isopach) maps
410	642010	4.75325e+06	Potter (1971) Bedrock Outcrop					590.617	180.02			590.617	180.02					Figure 6 (Bedrock Surface Contour) and Figure 7A (Isopach) maps
411	642794	4.75285e+06	Potter (1971) Bedrock Outcrop					601.732	183.408			601.732	183.408					Figure 6 (Bedrock Surface Contour) and Figure 7A (Isopach) maps
412	642874	4.75206e+06	Potter (1971) Bedrock Outcrop					594.846	181.309			594.846	181.309					Figure 6 (Bedrock Surface Contour) and Figure 7A (Isopach) maps
413	642738	4.75195e+06	Potter (1971) Bedrock Outcrop					626.624	190.995			626.624	190.995					Figure 6 (Bedrock Surface Contour) and Figure 7A (Isopach) maps
414	640781	4.75231e+06	Potter (1971) Bedrock Outcrop					717.911	218.819			717.911	218.819					Figure 6 (Bedrock Surface Contour) and Figure 7A (Isopach) maps
415	640808	4.75216e+06	Potter (1971) Bedrock Outcrop					793.418	241.834			793.418	241.834					Figure 6 (Bedrock Surface Contour) and Figure 7A (Isopach) maps
416	641055	4.75204e+06	Potter (1971) Bedrock Outcrop					700.145	213.404			700.145	213.404					Figure 6 (Bedrock Surface Contour) and Figure 7A (Isopach) maps
417	640991	4.75176e+06	Potter (1971) Bedrock Outcrop					715.388	218.05			715.388	218.05					Figure 6 (Bedrock Surface Contour) and Figure 7A (Isopach) maps
418	641191	4.75195e+06	Potter (1971) Bedrock Outcrop					685.814	209.036			685.814	209.036					Figure 6 (Bedrock Surface Contour) and Figure 7A (Isopach) maps
419	641280	4.75226e+06	Potter (1971) Bedrock Outcrop					661.632	201.665			661.632	201.665					Figure 6 (Bedrock Surface Contour) and Figure 7A (Isopach) maps
420	641377	4.75242e+06	Potter (1971) Bedrock Outcrop					631.496	192.48			631.496	192.48					Figure 6 (Bedrock Surface Contour) and Figure 7A (Isopach) maps
421	641481	4.75255e+06	Potter (1971) Bedrock Outcrop					652.086	198.756			652.086	198.756					Figure 6 (Bedrock Surface Contour) and Figure 7A (Isopach) maps
422	641689	4.7526e+06	Potter (1971) Bedrock Outcrop					629.749	191.948			629.749	191.948					Figure 6 (Bedrock Surface Contour) and Figure 7A (Isopach) maps
423	641730	4.75273e+06	Potter (1971) Bedrock Outcrop					610.348	186.034			610.348	186.034					Figure 6 (Bedrock Surface Contour) and Figure 7A (Isopach) maps
424	641634	4.75286e+06	Potter (1971) Bedrock Outcrop					618.034	188.377			618.034	188.377					Figure 6 (Bedrock Surface Contour) and Figure 7A (Isopach) maps
425	641481	4.75294e+06	Potter (1971) Bedrock Outcrop					594.96	181.344			594.96	181.344					Figure 6 (Bedrock Surface Contour) and Figure 7A (Isopach) maps
426	641401	4.7531e+06	Potter (1971) Bedrock Outcrop					564.732	172.13			564.732	172.13					Figure 6 (Bedrock Surface Contour) and Figure 7A (Isopach) maps
427	641562	4.75306e+06	Potter (1971) Bedrock Outcrop					544.526	165.972			544.526	165.972					Figure 6 (Bedrock Surface Contour) and Figure 7A (Isopach) maps
428	641802	4.75243e+06	Potter (1971) Bedrock Outcrop					558.592	170.259			558.592	170.259					Figure 6 (Bedrock Surface Contour) and Figure 7A (Isopach) maps
429	642329	4.75245e+06	Potter (1971) Bedrock Outcrop					551.437	168.078			551.437	168.078					Figure 6 (Bedrock Surface Contour) and Figure 7A (Isopach) maps
430	642414	4.75217e+06	Potter (1971) Bedrock Outcrop					569.308	173.525			569.308	173.525					Figure 6 (Bedrock Surface Contour) and Figure 7A (Isopach) maps
431	642143	4.75237e+06	Potter (1971) Bedrock Outcrop					625.768	190.734			625.768	190.734					Figure 6 (Bedrock Surface Contour) and Figure 7A (Isopach) maps
432	642007	4.75225e+06	Potter (1971) Bedrock Outcrop					603.186	183.851			603.186	183.851					Figure 6 (Bedrock Surface Contour) and Figure 7A (Isopach) maps
433	642054	4.75204e+06	Potter (1971) Bedrock Outcrop					651.955	198.716			651.955	198.716					Figure 6 (Bedrock Surface Contour) and Figure 7A (Isopach) maps
434	641996	4.75186e+06	Potter (1971) Bedrock Outcrop					679.807	207.205			679.807	207.205					Figure 6 (Bedrock Surface Contour) and Figure 7A (Isopach) maps
435	641888	4.75196e+06	Potter (1971) Bedrock Outcrop					652.588	198.909			652.588	198.909					Figure 6 (Bedrock Surface Contour) and Figure 7A (Isopach) maps
436	641880	4.75254e+06	Potter (1971) Bedrock Outcrop					564.264	171.988			564.264	171.988					Figure 6 (Bedrock Surface Contour) and Figure 7A (Isopach) maps
437	641448	4.75234e+06	Potter (1971) Bedrock Outcrop					613.523	187.002			613.523	187.002					Figure 6 (Bedrock Surface Contour) and Figure 7A (Isopach) maps
438	641551	4.75231e+06	Potter (1971) Bedrock Outcrop					591.681	180.344			591.681	180.344					Figure 6 (Bedrock Surface Contour) and Figure 7A (Isopach) maps
439	642165	4.75157e+06	Potter (1971) Bedrock Outcrop					656.572	200.123			656.572	200.123					Figure 6 (Bedrock Surface Contour) and Figure 7A (Isopach) maps
440	642273	4.75148e+06	Potter (1971) Bedrock Outcrop					701.237	213.737			701.237	213.737					Figure 6 (Bedrock Surface Contour) and Figure 7A (Isopach) maps
441	642398	4.75143e+06	Potter (1971) Bedrock Outcrop					684.281	208.569			684.281	208.569					Figure 6 (Bedrock Surface Contour) and Figure 7A (Isopach) maps
442	642284	4.75114e+06	Potter (1971) Bedrock Outcrop					779.524	237.599			779.524	237.599					Figure 6 (Bedrock Surface Contour) and Figure 7A (Isopach) maps
443	642068	4.75135e+06	Potter (1971) Bedrock Outcrop					739.639	225.442			739.639	225.442					Figure 6 (Bedrock Surface Contour) and Figure 7A (Isopach) maps
444	641836	4.75158e+06	Potter (1971) Bedrock Outcrop					711.725	216.934			711.725	216.934					Figure 6 (Bedrock Surface Contour) and Figure 7A (Isopach) maps
445	641908	4.75139e+06	Potter (1971) Bedrock Outcrop					739.961	225.54			739.961	225.54					Figure 6 (Bedrock Surface Contour) and Figure 7A (Isopach) maps
446	641755	4.75132e+06	Potter (1971) Bedrock Outcrop					750.749	228.828			750.749	228.828					Figure 6 (Bedrock Surface Contour) and Figure 7A (Isopach) maps
447	641329	4.75092e+06	Potter (1971) Bedrock Outcrop					832.3	253.685			832.3	253.685					Figure 6 (Bedrock Surface Contour) and Figure 7A (Isopach) maps
448	641456	4.7511e+06	Potter (1971) Bedrock Outcrop					822.673	250.751			822.673	250.751					Figure 6 (Bedrock Surface Contour) and Figure 7A (Isopach) maps
449	641899	4.75068e+06	Potter (1971) Bedrock Outcrop					861.587	262.612			861.587	262.612					Figure 6 (Bedrock Surface Contour) and Figure 7A (Isopach) maps
450	642179	4.75068e+06	Potter (1971) Bedrock Outcrop					771.004	235.002			771.004	235.002					Figure 6 (Bedrock Surface Contour) and Figure 7A (Isopach) maps
451	641935	4.75053e+06	Potter (1971) Bedrock Outcrop					834.969	254.499			834.969	254.499					Figure 6 (Bedrock Surface Contour) and Figure 7A (Isopach) maps
452	640919	4.74806e+06	Potter (1971) Bedrock Outcrop					745.232	227.147			745.232	227.147					Figure 6 (Bedrock Surface Contour) and Figure 7A (Isopach) maps
453	640958	4.74821e+06	Potter (1971) Bedrock Outcrop					773.851	235.87			773.851	235.87					Figure 6 (Bedrock Surface Contour) and Figure 7A (Isopach) maps
454	641251	4.74831e+06	Potter (1971) Bedrock Outcrop					800.866	244.104			800.866	244.104					Figure 6 (Bedrock Surface Contour) and Figure 7A (Isopach) maps
455	640908	4.7486e+06	Potter (1971) Bedrock Outcrop					854.474	260.444			854.474	260.444					Figure 6 (Bedrock Surface Contour) and Figure 7A (Isopach) maps
456	641088	4.74874e+06	Potter (1971) Bedrock Outcrop					859.625	262.014			859.625	262.014					Figure 6 (Bedrock Surface Contour) and Figure 7A (Isopach) maps
457	641243	4.74884e+06	Potter (1971) Bedrock Outcrop					968.45	295.184			968.45	295.184					Figure 6 (Bedrock Surface Contour) and Figure 7A (Isopach) maps
458	641351	4.74893e+06	Potter (1971) Bedrock Outcrop					1022.15	311.552			1022.15	311.552					Figure 6 (Bedrock Surface Contour) and Figure 7A (Isopach) maps
459	641185	4.74915e+06	Potter (1971) Bedrock Outcrop					1008.97	307.534			1008.97	307.534					Figure 6 (Bedrock Surface Contour) and Figure 7A (Isopach) maps
460	641329	4.74921e+06	Potter (1971) Bedrock Outcrop					1115.56	340.023			1115.56	340.023					Figure 6 (Bedrock Surface Contour) and Figure 7A (Isopach) maps
461	641246	4.7493e+06	Potter (1971) Bedrock Outcrop					1093.25	333.224			1093.25	333.224					Figure 6 (Bedrock Surface Contour) and Figure 7A (Isopach) maps
462	641265	4.74938e+06	Potter (1971) Bedrock Outcrop					1094.09	333.479			1094.09	333.479					Figure 6 (Bedrock Surface Contour) and Figure 7A (Isopach) maps
463	641567	4.74946e+06	Potter (1971) Bedrock Outcrop					1079.37	328.993			1079.37	328.993					Figure 6 (Bedrock Surface Contour) and Figure 7A (Isopach) maps
464	641443	4.74951e+06	Potter (1971) Bedrock Outcrop					1179.87	359.624			1179.87	359.624					Figure 6 (Bedrock Surface Contour) and Figure 7A (Isopach) maps
465	641587	4.74964e+06	Potter (1971) Bedrock Outcrop					1107.29	337.503			1107.29	337.503					Figure 6 (Bedrock Surface Contour) and Figure 7A (Isopach) maps
466	641888	4.7499e+06	Potter (1971) Bedrock Outcrop					958.359	292.108			958.359	292.108					Figure 6 (Bedrock Surface Contour) and Figure 7A (Isopach) maps
467	641886	4.75016e+06	Potter (1971) Bedrock Outcrop					964.21	293.891			964.21	293.891					Figure 6 (Bedrock Surface Contour) and Figure 7A (Isopach) maps
468	641758	4.7501e+06	Potter (1971) Bedrock Outcrop					1084.04	330.416			1084.04	330.416					Figure 6 (Bedrock Surface Contour) and Figure 7A (Isopach) maps
469	641728	4.75024e+06	Potter (1971) Bedrock Outcrop					1114.52	339.705			1114.52	339.705					Figure 6 (Bedrock Surface Contour) and Figure 7A (Isopach) maps
470	641797	4.75037e+06	Potter (1971) Bedrock Outcrop					1037.94	316.363			1037.94	316.363					Figure 6 (Bedrock Surface Contour) and Figure 7A (Isopach) maps
471	641863	4.75044e+06	Potter (1971) Bedrock Outcrop					934.141	284.726			934.141	284.726					Figure 6 (Bedrock Surface Contour) and Figure 7A (Isopach) maps
472	641642	4.75047e+06	Potter (1971) Bedrock Outcrop					1134.27	345.727			1134.27	345.727					Figure 6 (Bedrock Surface Contour) and Figure 7A (Isopach) maps
473	641534	4.75042e+06	Potter (1971) Bedrock Outcrop					1209.34	368.608			1209.34	368.608					Figure 6 (Bedrock Surface Contour) and Figure 7A (Isopach) maps
474	641429	4.75052e+06	Potter (1971) Bedrock Outcrop					1009.23	307.614			1009.23	307.614					Figure 6 (Bedrock Surface Contour) and Figure 7A (Isopach) maps
475	641340	4.75036e+06	Potter (1971) Bedrock Outcrop					1064.24	324.38			1064.24	324.38					Figure 6 (Bedrock Surface Contour) and Figure 7A (Isopach) maps
476	641326	4.75016e+06	Potter (1971) Bedrock Outcrop					1155.28	352.13			1155.28	352.13					Figure 6 (Bedrock Surface Contour) and Figure 7A (Isopach) maps
477	641011	4.74991e+06	Potter (1971) Bedrock Outcrop					1048.27	319.513			1048.27	319.513					Figure 6 (Bedrock Surface Contour) and Figure 7A (Isopach) maps
478	640880	4.74979e+06	Potter (1971) Bedrock Outcrop					969.939	295.637			969.939	295.637					Figure 6 (Bedrock Surface Contour) and Figure 7A (Isopach) maps
479	640759	4.74962e+06	Potter (1971) Bedrock Outcrop					862.085	262.763			862.085	262.763					Figure 6 (Bedrock Surface Contour) and Figure 7A (Isopach) maps
480	640916	4.74961e+06	Potter (1971) Bedrock Outcrop					1025.44	312.555			1025.44	312.555					Figure 6 (Bedrock Surface Contour) and Figure 7A (Isopach) maps
481	640844	4.74938e+06	Potter (1971) Bedrock Outcrop					936.644	285.489			936.644	285.489					Figure 6 (Bedrock Surface Contour) and Figure 7A (Isopach) maps
482	640897	4.74931e+06	Potter (1971) Bedrock Outcrop					973.027	296.579			973.027	296.579					Figure 6 (Bedrock Surface Contour) and Figure 7A (Isopach) maps
483	640928	4.74918e+06	Potter (1971) Bedrock Outcrop					930.842	283.721			930.842	283.721					Figure 6 (Bedrock Surface Contour) and Figure 7A (Isopach) maps
484	641218	4.74964e+06	Potter (1971) Bedrock Outcrop					1051.58	320.522			1051.58	320.522					Figure 6 (Bedrock Surface Contour) and Figure 7A (Isopach) maps
485	641373	4.74968e+06	Potter (1971) Bedrock Outcrop					1106.52	337.269			1106.52	337.269					Figure 6 (Bedrock Surface Contour) and Figure 7A (Isopach) maps
486	641467	4.74984e+06	Potter (1971) Bedrock Outcrop					1187.18	361.852			1187.18	361.852					Figure 6 (Bedrock Surface Contour) and Figure 7A (Isopach) maps
487	640977	4.75156e+06	Potter (1971) Bedrock Outcrop					728.642	222.09			728.642	222.09					Figure 6 (Bedrock Surface Contour) and Figure 7A (Isopach) maps
488	640761	4.75076e+06	Potter (1971) Bedrock Outcrop					818.635	249.52			818.635	249.52					Figure 6 (Bedrock Surface Contour) and Figure 7A (Isopach) maps
489	646796	4753751	Kim (2017)Bedrock Outcrop					1000.36	304.909			1000.36	304.909					Figure 6 (Bedrock Surface Contour) and Figure 7A (Isopach) maps
490	646806	4753817	Kim (2017)Bedrock Outcrop					999.088	304.522			999.088	304.522					Figure 6 (Bedrock Surface Contour) and Figure 7A (Isopach) maps
491	646846	4753839	Kim (2017)Bedrock Outcrop					988.225	301.211			988.225	301.211					Figure 6 (Bedrock Surface Contour) and Figure 7A (Isopach) maps
492	647410	4754598	Kim (2017)Bedrock Outcrop					1034.39	315.283			1034.39	315.283					Figure 6 (Bedrock Surface Contour) and Figure 7A (Isopach) maps
493	647399	4754598	Kim (2017)Bedrock Outcrop					1038.6	316.565			1038.6	316.565					Figure 6 (Bedrock Surface Contour) and Figure 7A (Isopach) maps
494	647333	4754575	Kim (2017)Bedrock Outcrop					1026.55	312.892			1026.55	312.892					Figure 6 (Bedrock Surface Contour) and Figure 7A (Isopach) maps
495	647250	4754586	Kim (2017)Bedrock Outcrop					1036.26	315.851			1036.26	315.851					Figure 6 (Bedrock Surface Contour) and Figure 7A (Isopach) maps
496	645128	4754447	Kim (2017)Bedrock Outcrop					725.335	221.082			725.335	221.082					Figure 6 (Bedrock Surface Contour) and Figure 7A (Isopach) maps
497	645129	4754463	Kim (2017)Bedrock Outcrop					725.971	221.276			725.971	221.276					Figure 6 (Bedrock Surface Contour) and Figure 7A (Isopach) maps
498	645128	4754460	Kim (2017)Bedrock Outcrop					725.715	221.198			725.715	221.198					Figure 6 (Bedrock Surface Contour) and Figure 7A (Isopach) maps
499	645117	4754429	Kim (2017)Bedrock Outcrop					714.095	217.656			714.095	217.656					Figure 6 (Bedrock Surface Contour) and Figure 7A (Isopach) maps
			Explanation of Columns:
			Point #- Sequential point number in the spreadsheet
			X (UTM)- X coordinate in meters, Universal Transverse Mercator format, NAD83 datum
			Y (UTM)- Y coordinate in meters, Universal Tranverse Mercator format, NAD83 datum
			Data Type- well (41), bedrock outcrop from DeSimone (2017)(54), bedrock outcrop from Kim (2017)(49), bedrock outcrop from Potter (2017)(48)
			Tag #- well tag number (41)
			Well Report #- well report # (41)
			Date Driller- date well was drilled (41)
			Well Depth- total well depth (41)
			Ground Surface Elevation (ft)- well elevation at ground surface in feet
			Ground Surface Elevation (m)- well elevation at ground surface in meters
			Depth to Bedrock (ft)(BGS)- depth to bedrock below ground surface in feet
			Depth to Bedrock (m)(BGS)- depth to bedrock below ground surface in meters
			Bedrock Surface Elevation (ft)(ASL)- bedrock surface elevation (ft)(ASL)- bedrock surface elevation above sea level in feet
			Bedrock Surface Elevation (ft)(ASL)- bedrock surface elevation (m)(ASL)- bedrock surface elevation above sea level in meters
			Static Water Level (ft)(BGS)- static water below ground surface in feet
			Static Water Level (m)(BGS)- static water below ground surface in meters
			Static Water Level (ft)(ASL)- static water level elevation above sea level in feet
			Static Water Level (m))(ASL)- static water level elevation above sea level in meters
			Data Used for Map Figure(s)- The derivative maps that the point was used for (Figure 6 (Bedrock Surface Contour Map), Figure 7A (Isopach Map), and Figure 7B (Static Water Level Map)
